# Supplementary material
Source: PubMed Central journal article supplement (PMC3114947)

# Supporting Information

for

## Sequential two-step multienzyme synthesis of tumor-associated sialyl T-antigens and derivatives

Kam Lau, Hai Yu, Vireak Thon, Zahra Khedri, Meghan E. Leon, Bao K. Tran and Xi Chen\*

Department of Chemistry, University of California, One Shields Avenue, Davis, CA 95616, USA

\*Correspondence to: Xi Chen, Department of Chemistry, University of California, One Shields Avenue, Davis, California, 95616, USA. Tel: 530-754-6037; Fax: 530-752-8995; E-mail: [chen@chem.ucdavis.edu](mailto:chen@chem.ucdavis.edu)

### Table of Contents

|                                                                             |         |
|-----------------------------------------------------------------------------|---------|
| <sup>1</sup> H and <sup>13</sup> C NMR spectra for compound <b>10</b> ..... | S2–S3   |
| <sup>1</sup> H and <sup>13</sup> C NMR spectra for compound <b>11</b> ..... | S4–S5   |
| <sup>1</sup> H and <sup>13</sup> C NMR spectra for compound <b>12</b> ..... | S6–S7   |
| <sup>1</sup> H and <sup>13</sup> C NMR spectra for compound <b>13</b> ..... | S8–S9   |
| <sup>1</sup> H and <sup>13</sup> C NMR spectra for compound <b>14</b> ..... | S10–S11 |
| <sup>1</sup> H and <sup>13</sup> C NMR spectra for compound <b>15</b> ..... | S12–S13 |
| <sup>1</sup> H and <sup>13</sup> C NMR spectra for compound <b>23</b> ..... | S14–S15 |
| <sup>1</sup> H and <sup>13</sup> C NMR spectra for compound <b>24</b> ..... | S16–S17 |
| <sup>1</sup> H and <sup>13</sup> C NMR spectra for compound <b>25</b> ..... | S18–S19 |
| <sup>1</sup> H and <sup>13</sup> C NMR spectra for compound <b>26</b> ..... | S20–S21 |
| <sup>1</sup> H and <sup>13</sup> C NMR spectra for compound <b>27</b> ..... | S22–S23 |
| <sup>1</sup> H and <sup>13</sup> C NMR spectra for compound <b>28</b> ..... | S24–S25 |
| <sup>1</sup> H and <sup>13</sup> C NMR spectra for compound <b>29</b> ..... | S26–S27 |

$^1\text{H}$  NMR of sialoside Neu5Ac $\alpha$ 2-3Gal $\beta$ 1-3GalNAc $\alpha$ ProN $_3$  **10**

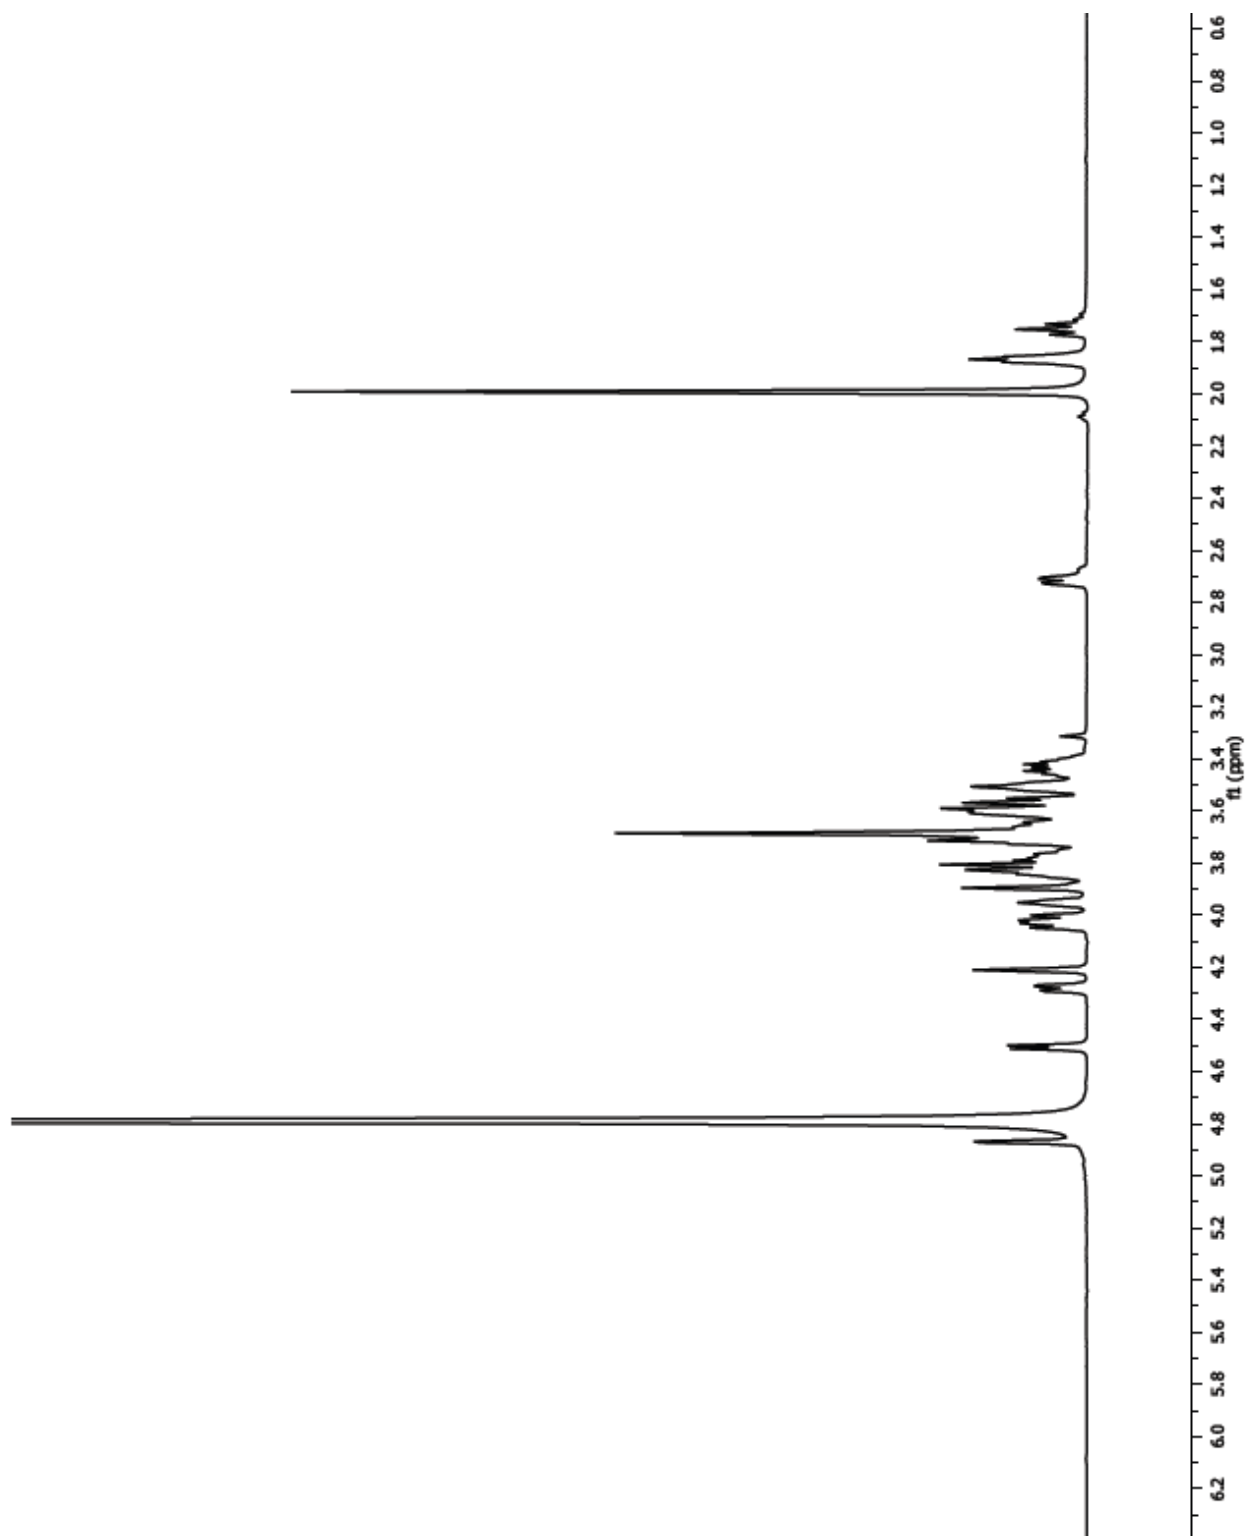

$^{13}\text{C}$  NMR of sialoside Neu5Ac $\alpha$ 2-3Gal $\beta$ 1-3GalNAc $\alpha$ ProN $_3$  **10**

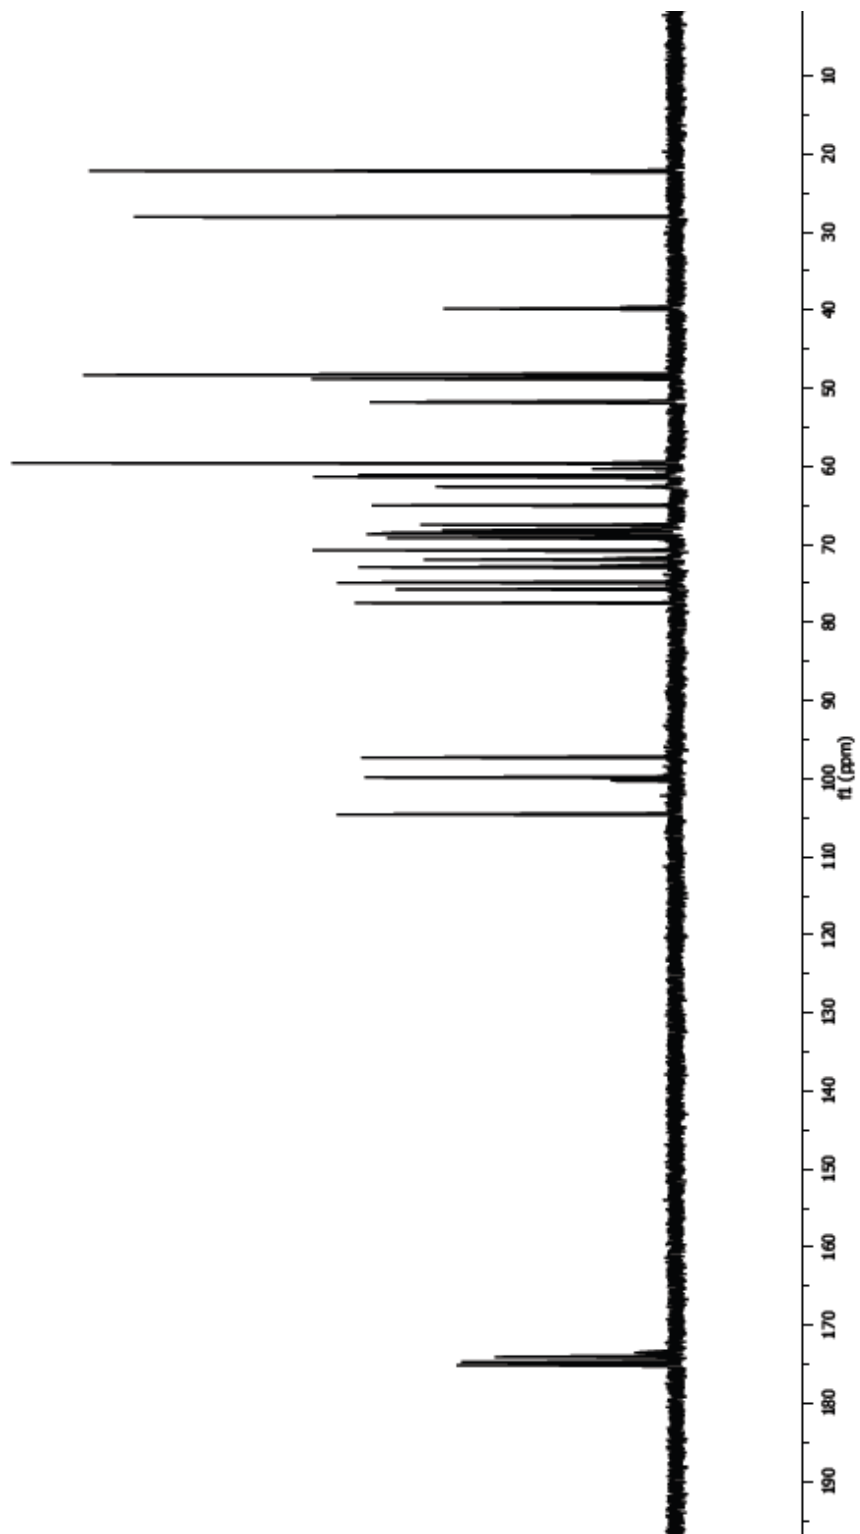

$^1\text{H}$  NMR of sialoside Neu5Gc $\alpha$ 2-3Gal $\beta$ 1-3GalNAc $\alpha$ ProN $_3$  **11**

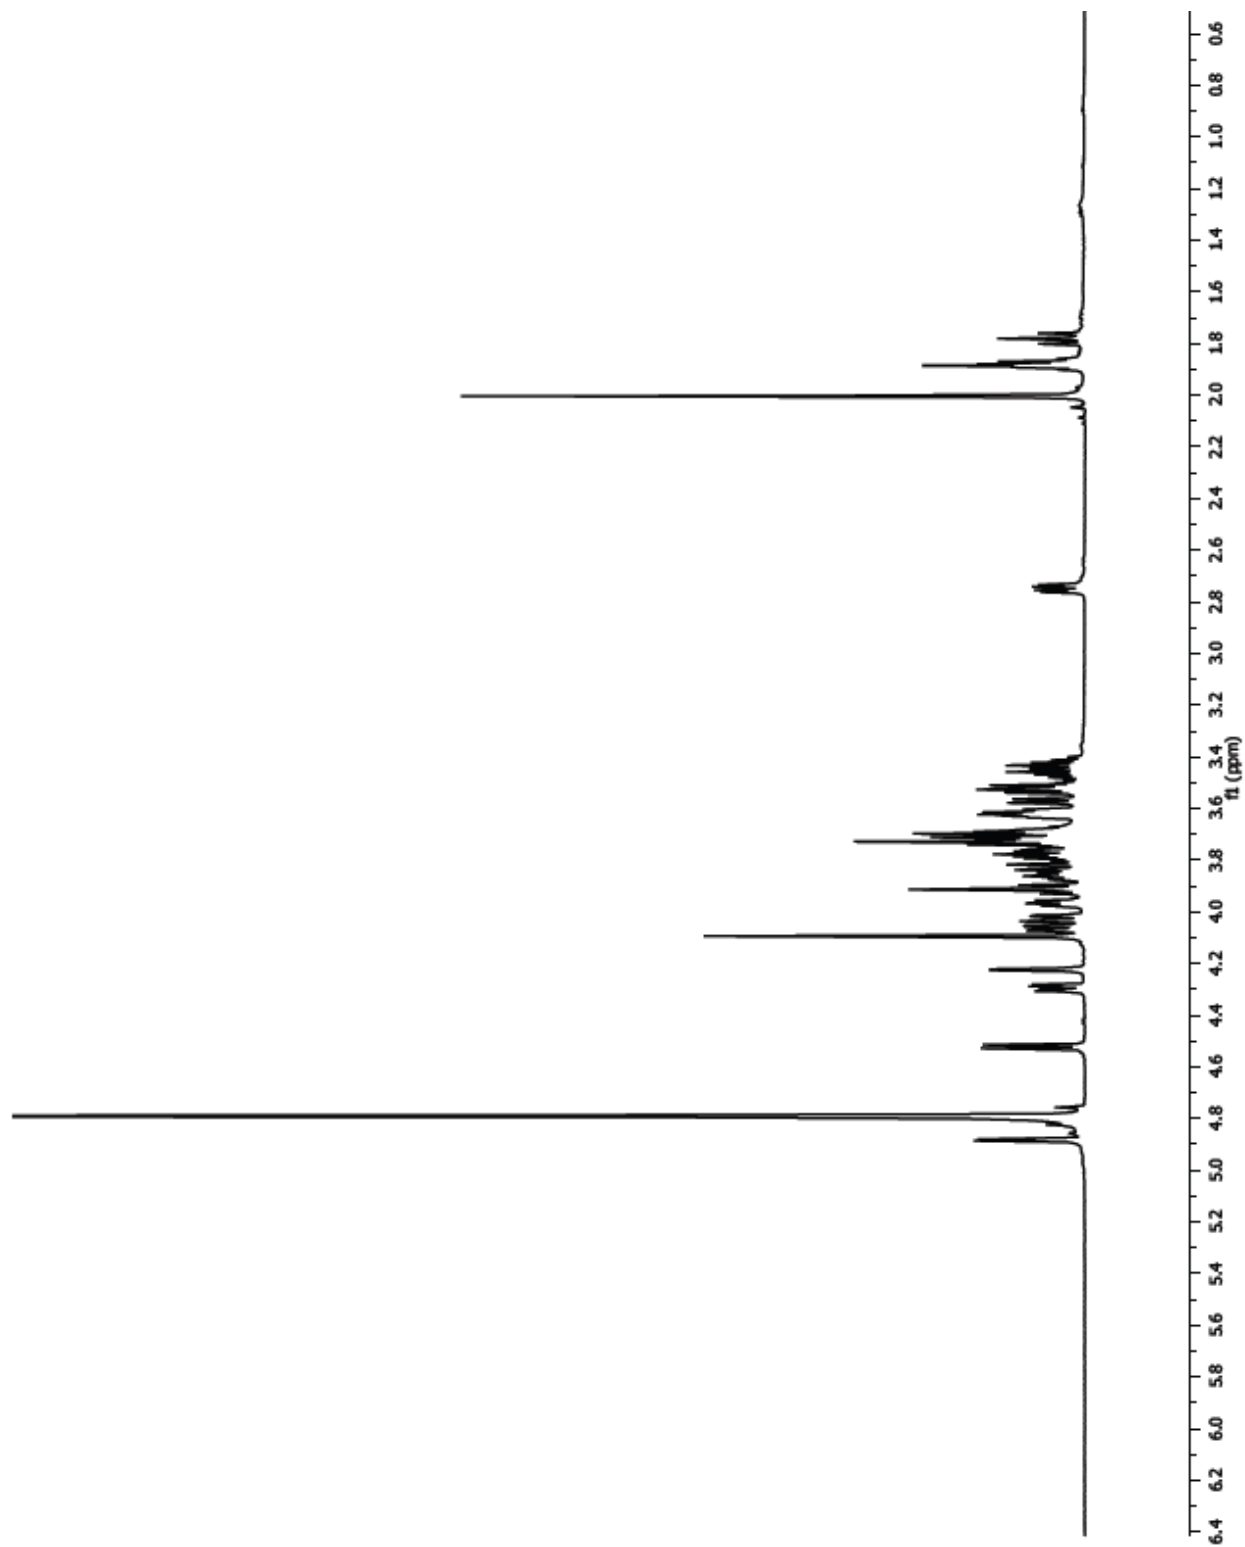

$^{13}\text{C}$  NMR of sialoside Neu5Gc $\alpha$ 2-3Gal $\beta$ 1-3GalNAc $\alpha$ ProN $_3$  **11**

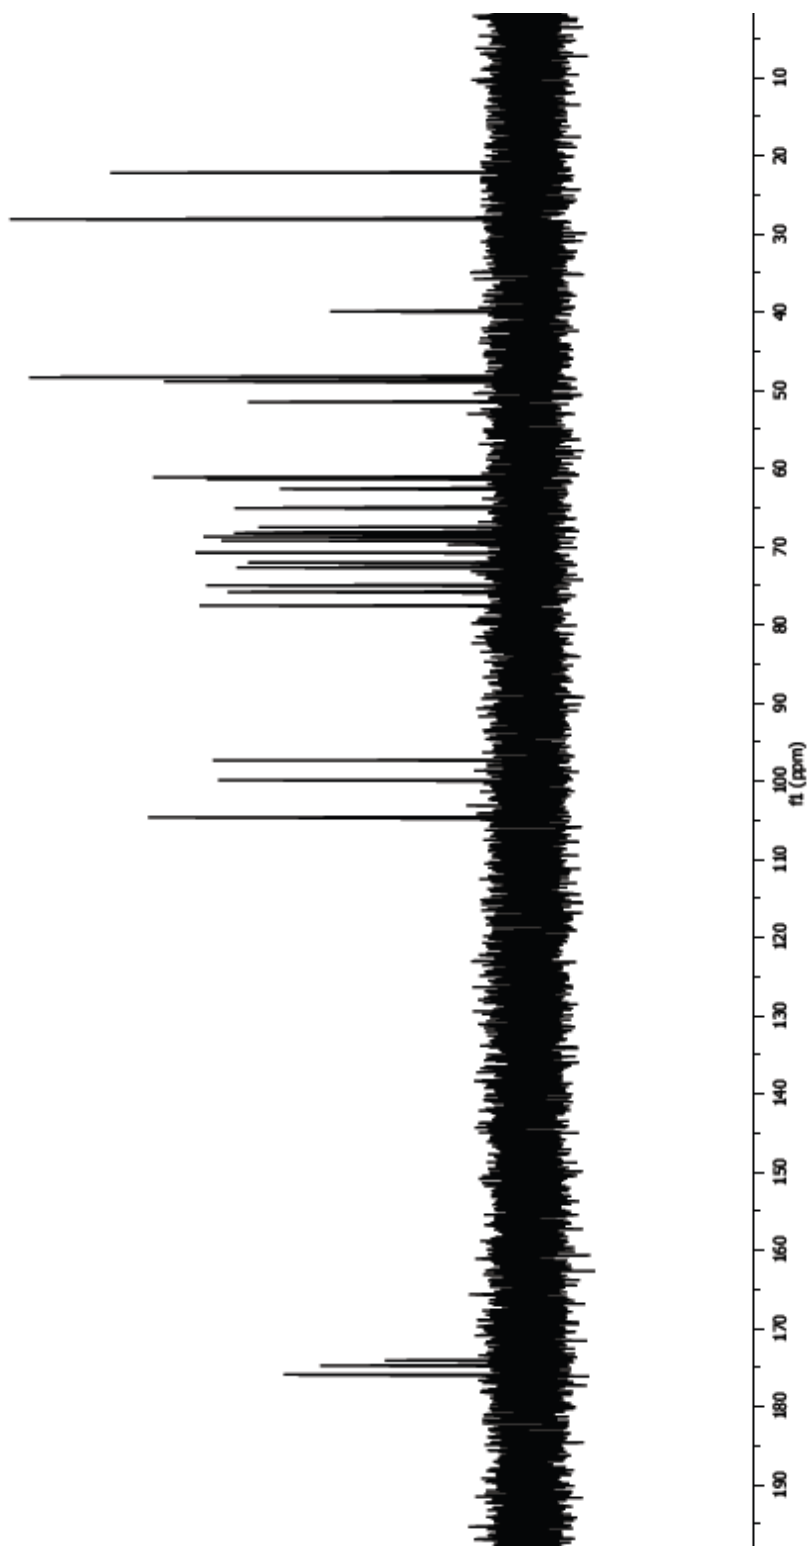

$^1\text{H}$  NMR of sialoside  $\text{Kdn}\alpha 2\text{-}3\text{Gal}\beta 1\text{-}3\text{GalNAc}\alpha\text{ProN}_3$  **12**

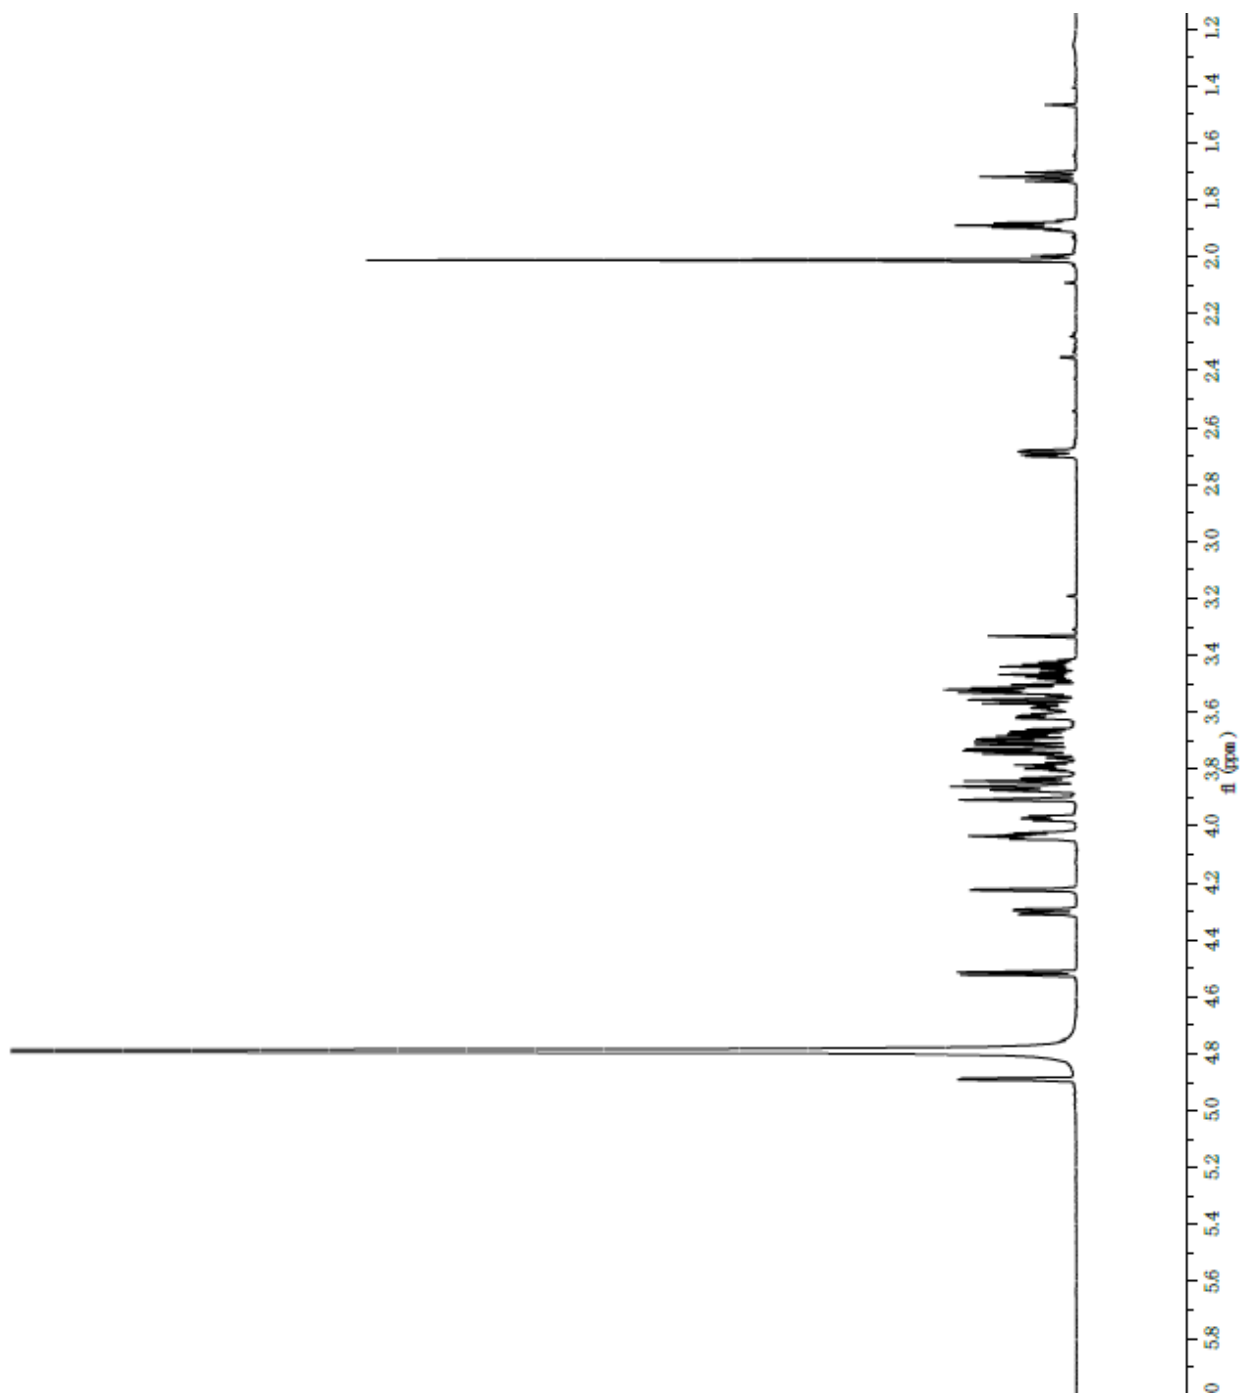

$^{13}\text{C}$  NMR of sialoside  $\text{Kdn}\alpha 2\text{-}3\text{Gal}\beta 1\text{-}3\text{GalNAc}\alpha\text{ProN}_3$  **12**

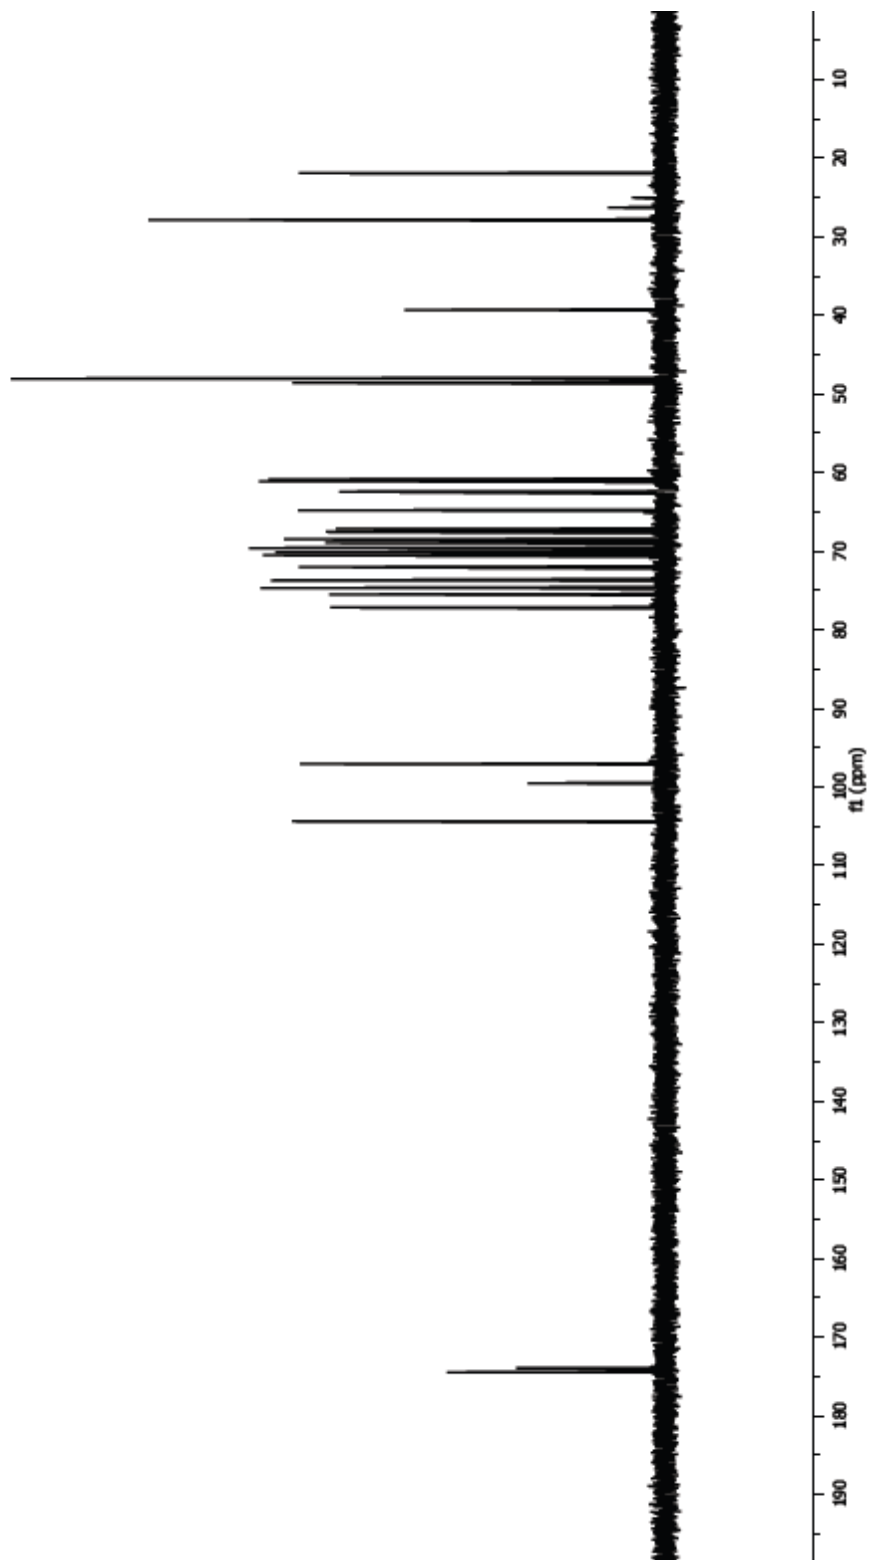

$^1\text{H}$  NMR of sialoside  $\text{Kdn5N}_3\alpha 2\text{-3Gal}\beta 1\text{-3GalNAc}\alpha\text{ProN}_3$  **13**

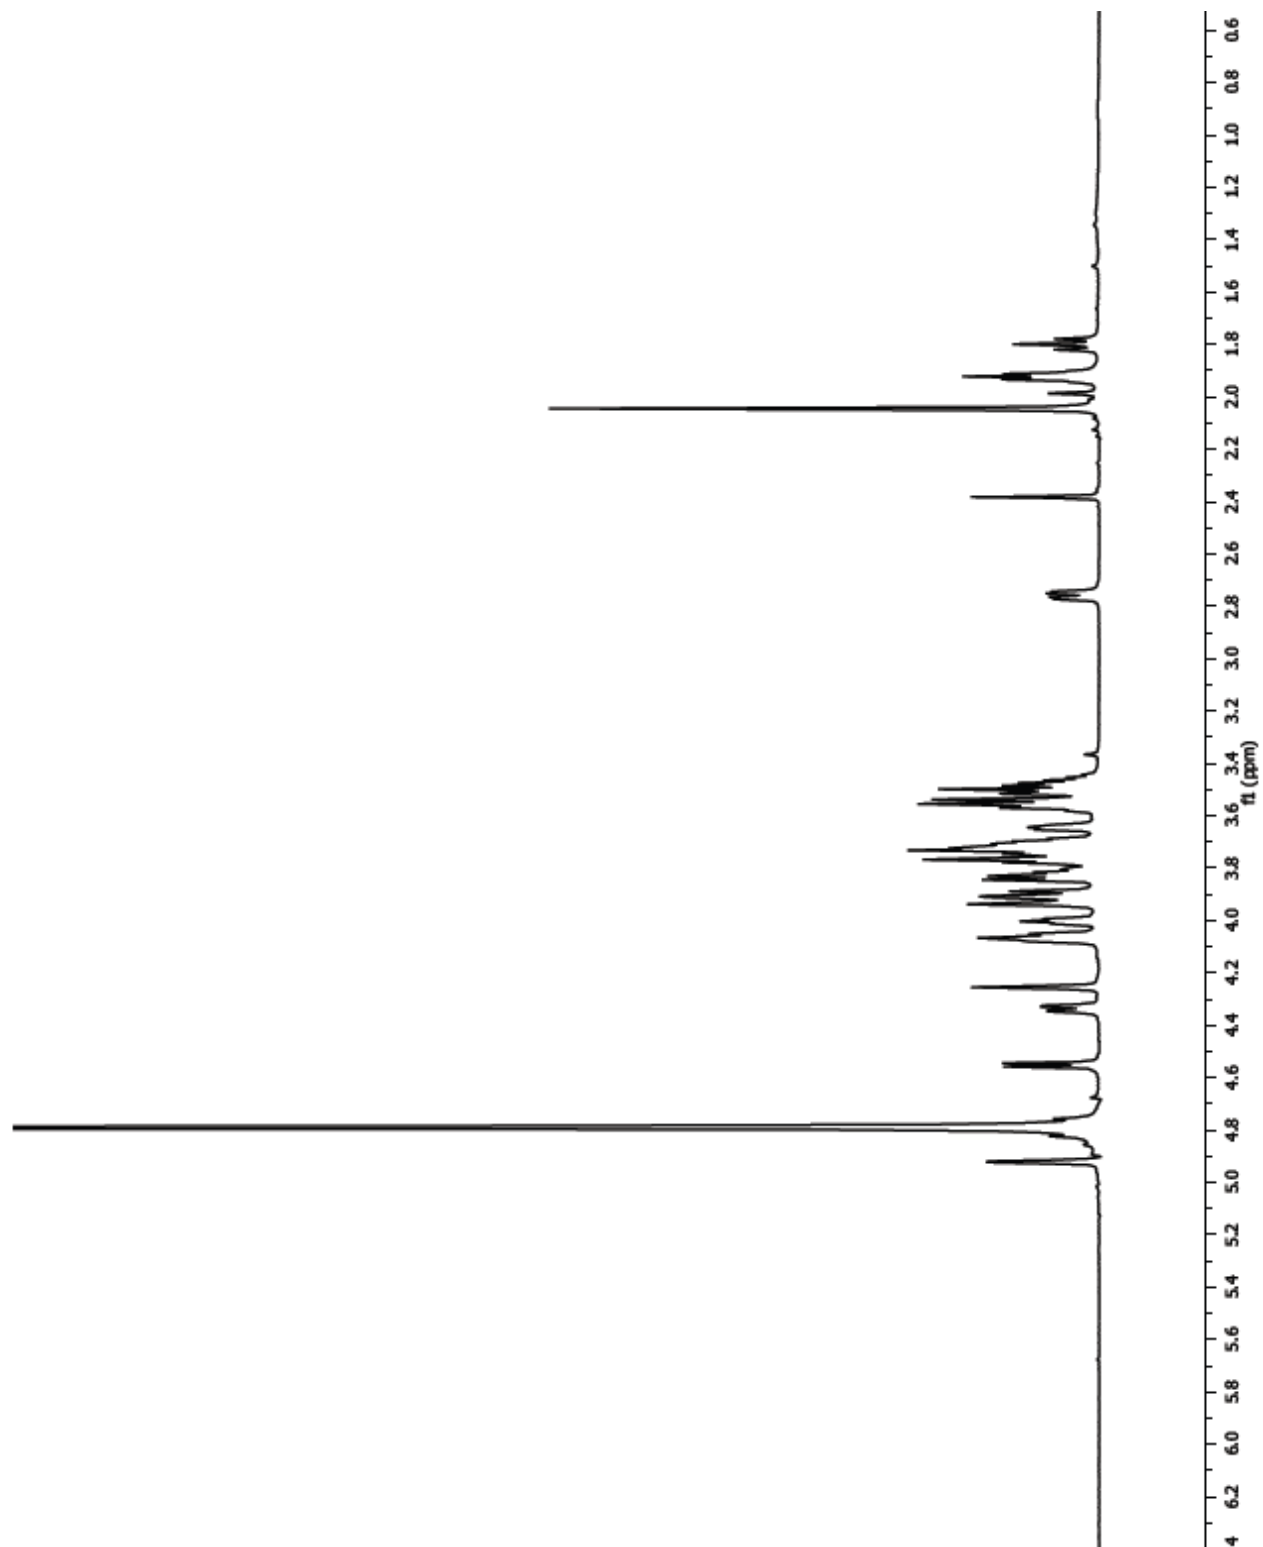



$^{13}\text{C}$  NMR of sialoside Kdn5N<sub>3</sub>α2-3Galβ1-3GalNAcαProN<sub>3</sub> **13**

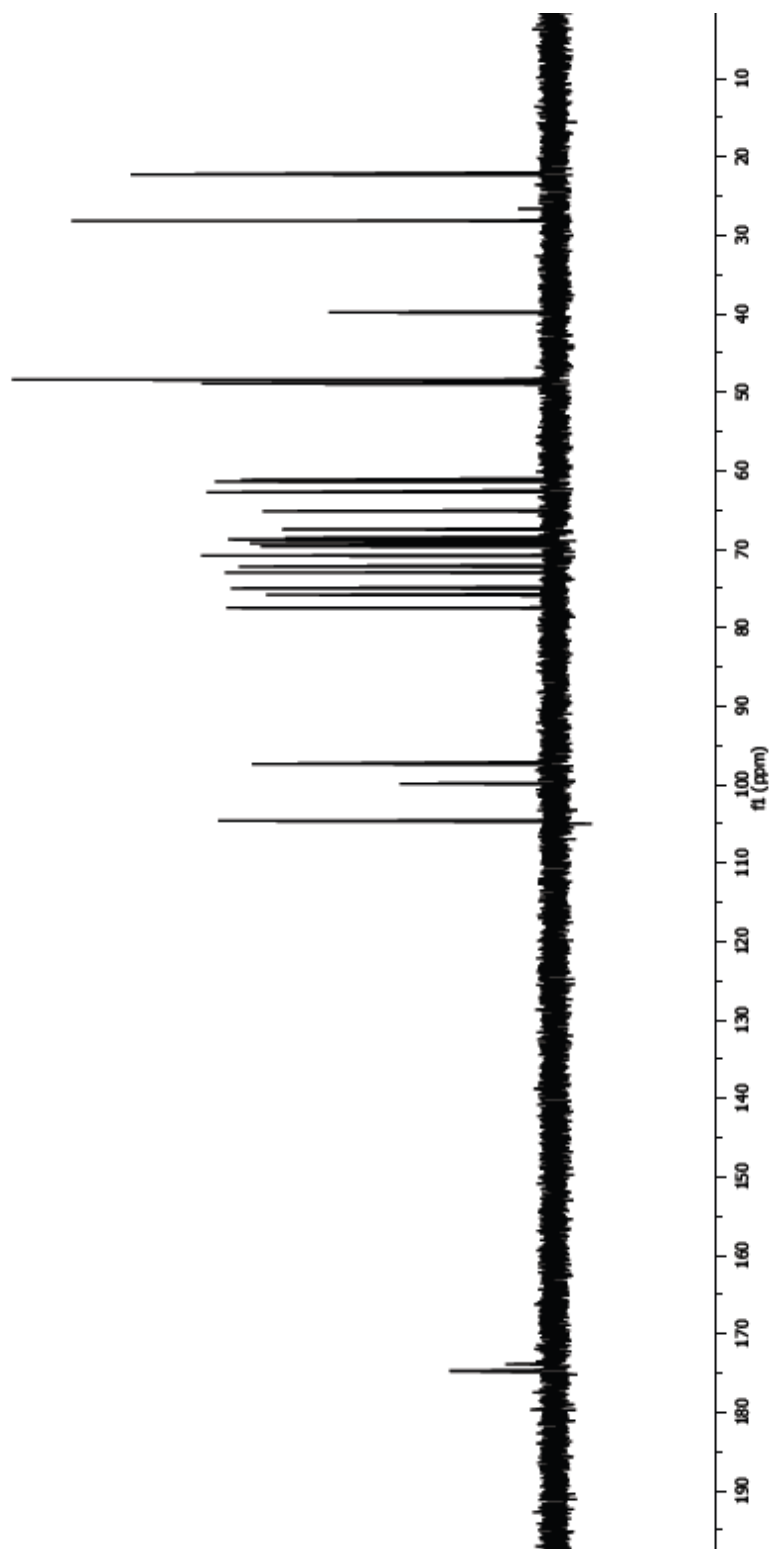

$^1\text{H}$  NMR of sialoside Neu5AcN<sub>3</sub>α2-3Galβ1-3GalNAcαProN<sub>3</sub> **14**

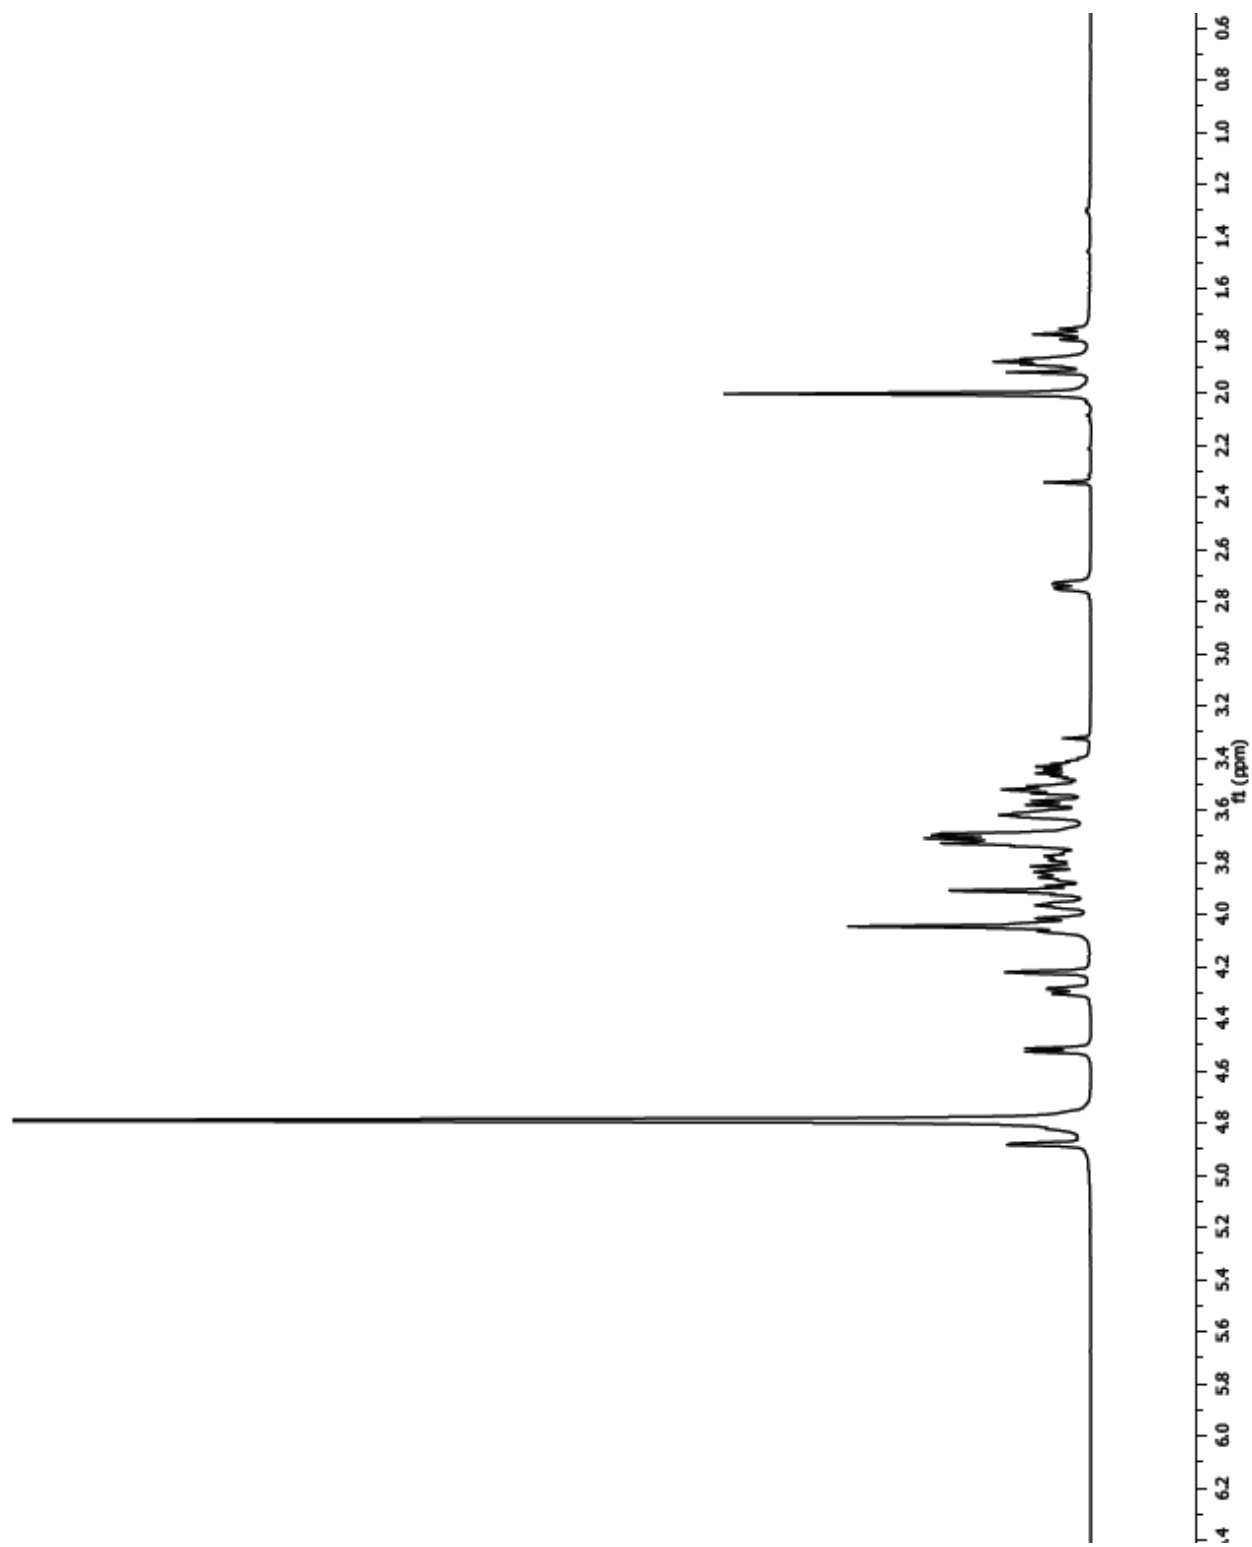

$^{13}\text{C}$  NMR of sialoside Neu5AcN<sub>3</sub>α2-3Galβ1-3GalNAcαProN<sub>3</sub> **14**

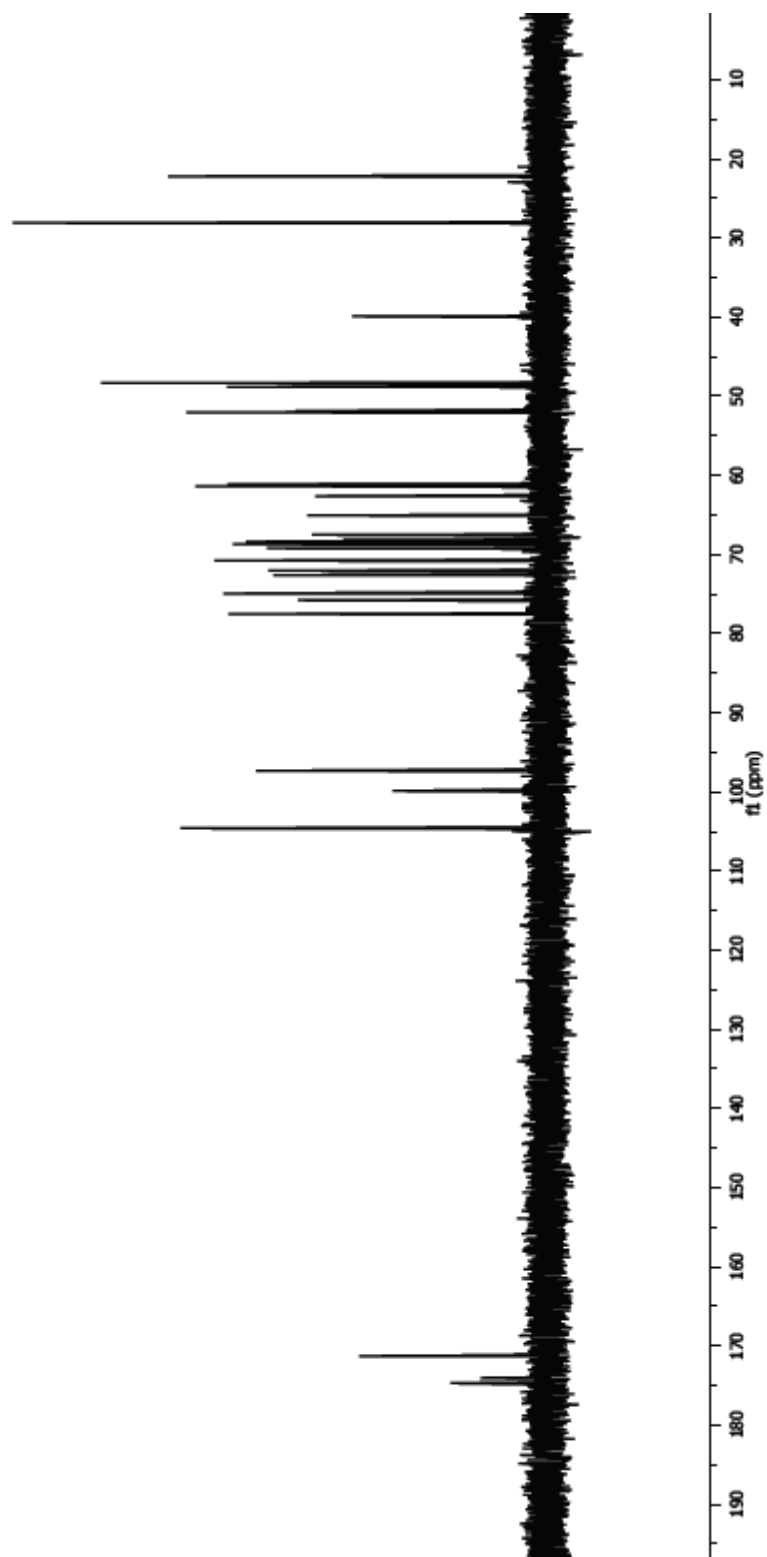

$^1\text{H}$  NMR of sialoside Neu5Ac9N<sub>3</sub> $\alpha$ 2-3Gal $\beta$ 1-3GalNAc $\alpha$ ProN<sub>3</sub> **15**

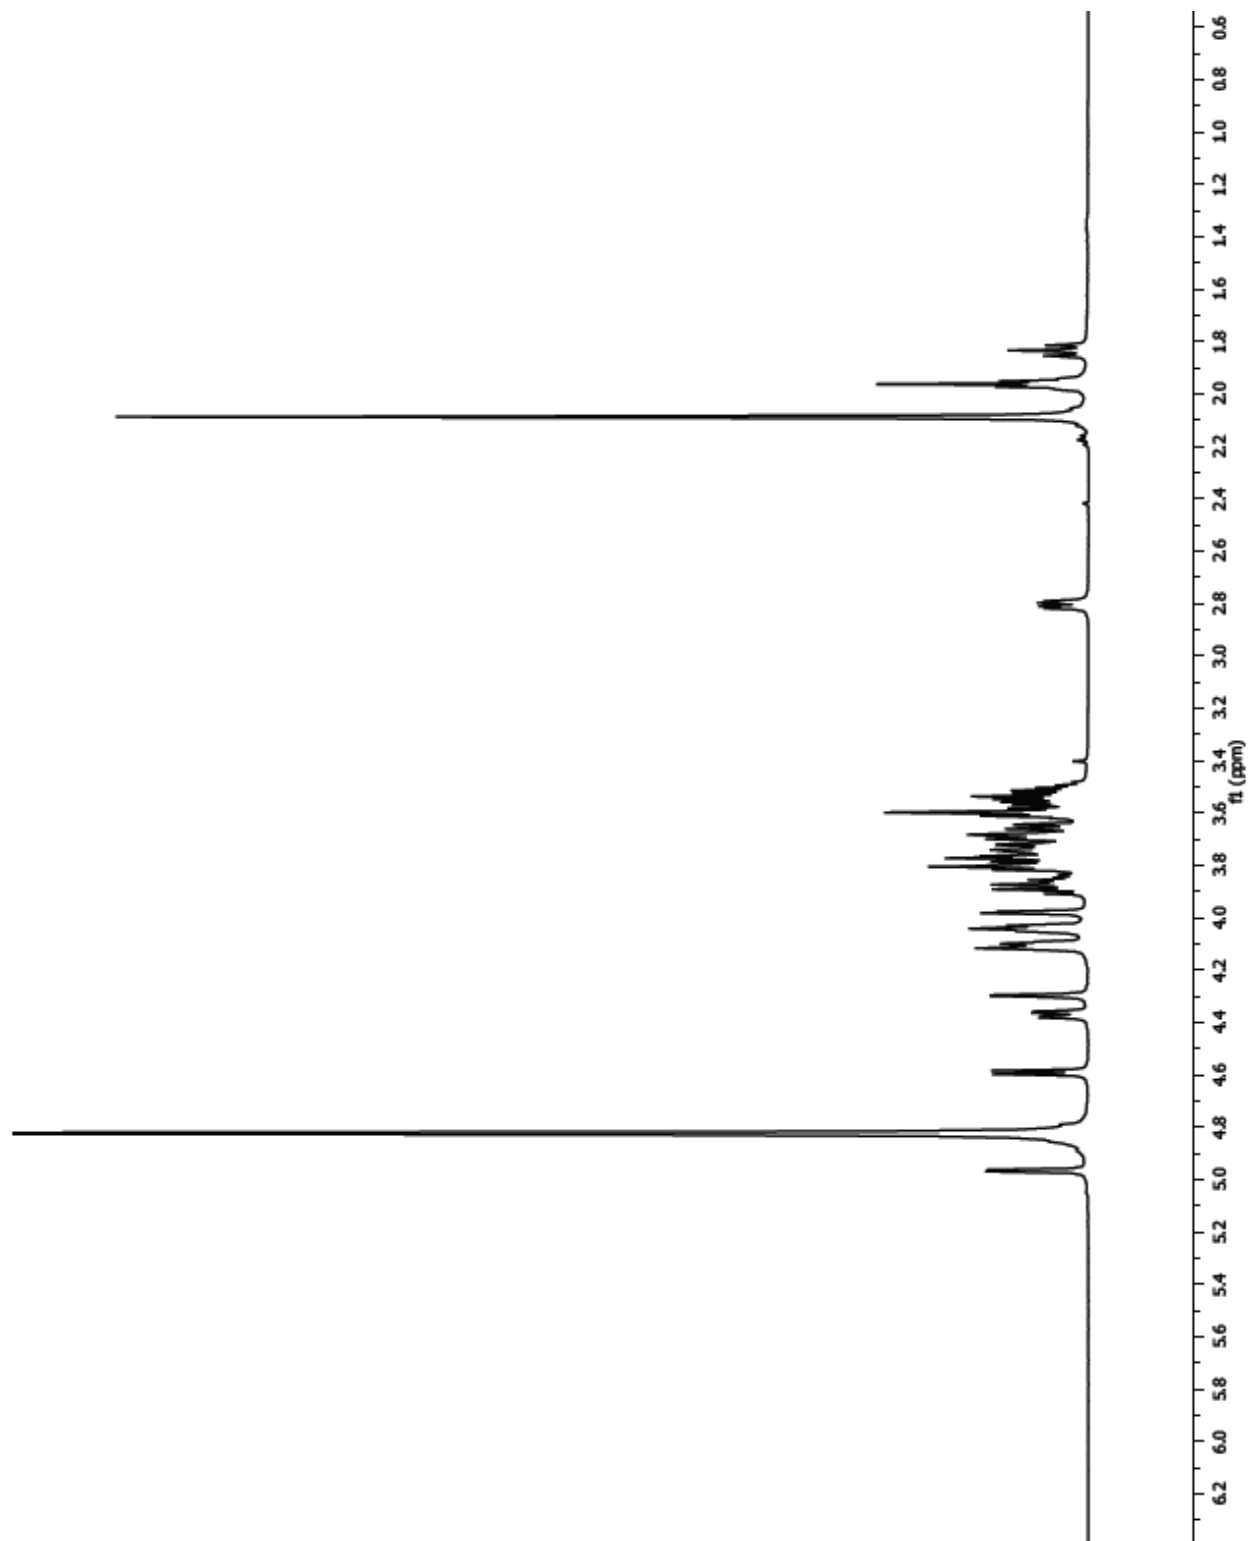

$^{13}\text{C}$  NMR of sialoside Neu5Ac9N<sub>3</sub> $\alpha$ 2-3Gal $\beta$ 1-3GalNAc $\alpha$ ProN<sub>3</sub> **15**

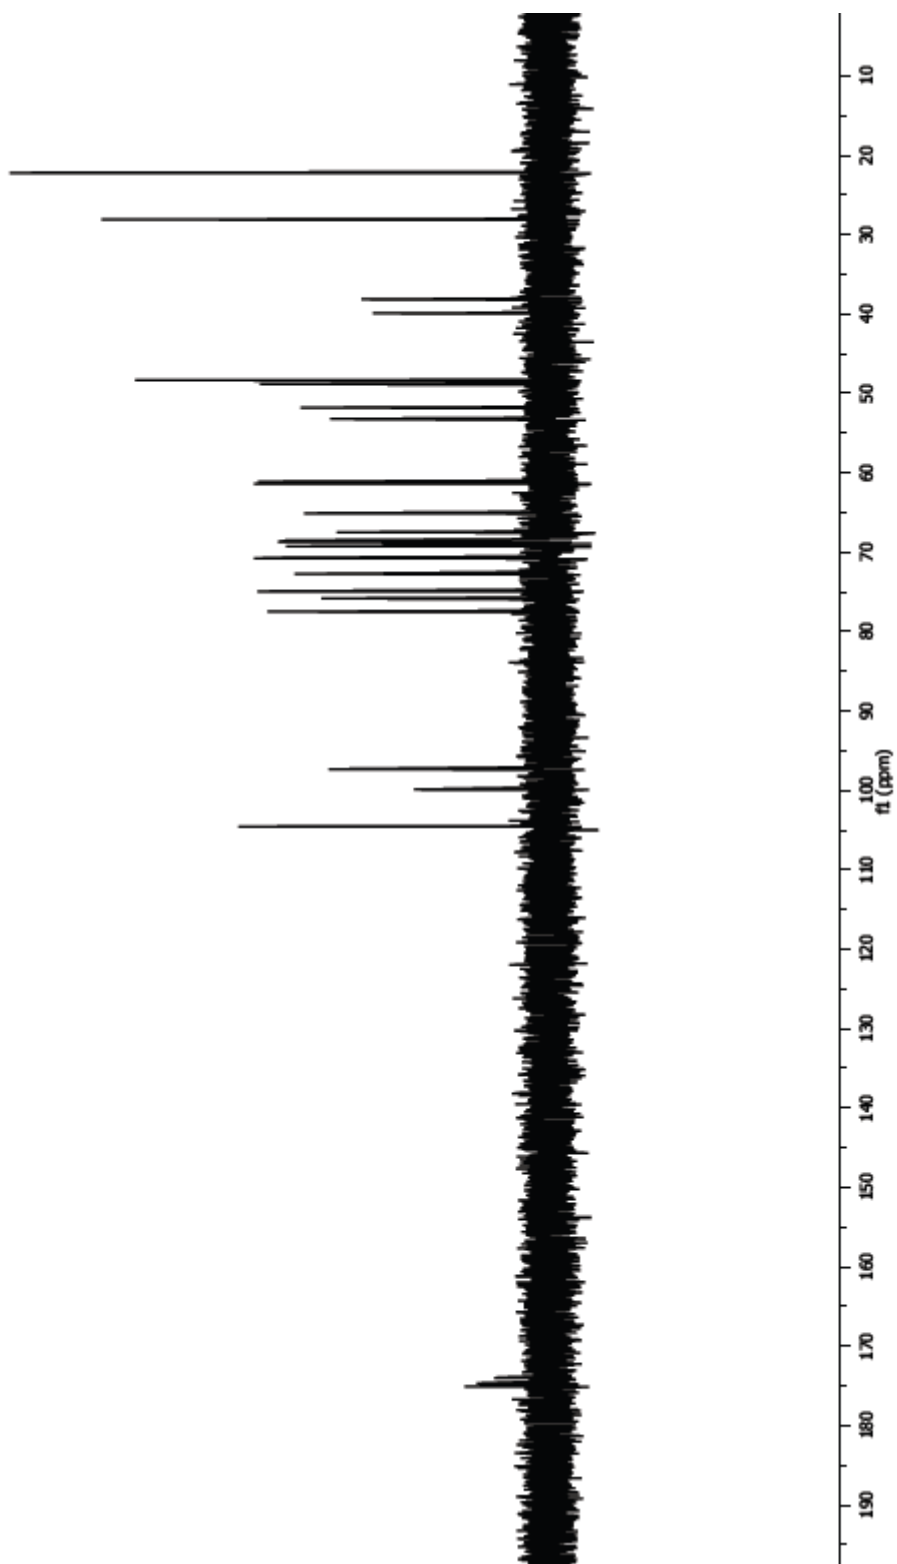

$^1\text{H}$  NMR of sialoside Neu5Ac $\alpha$ 2-3Gal $\beta$ 1-3GalNAc 23

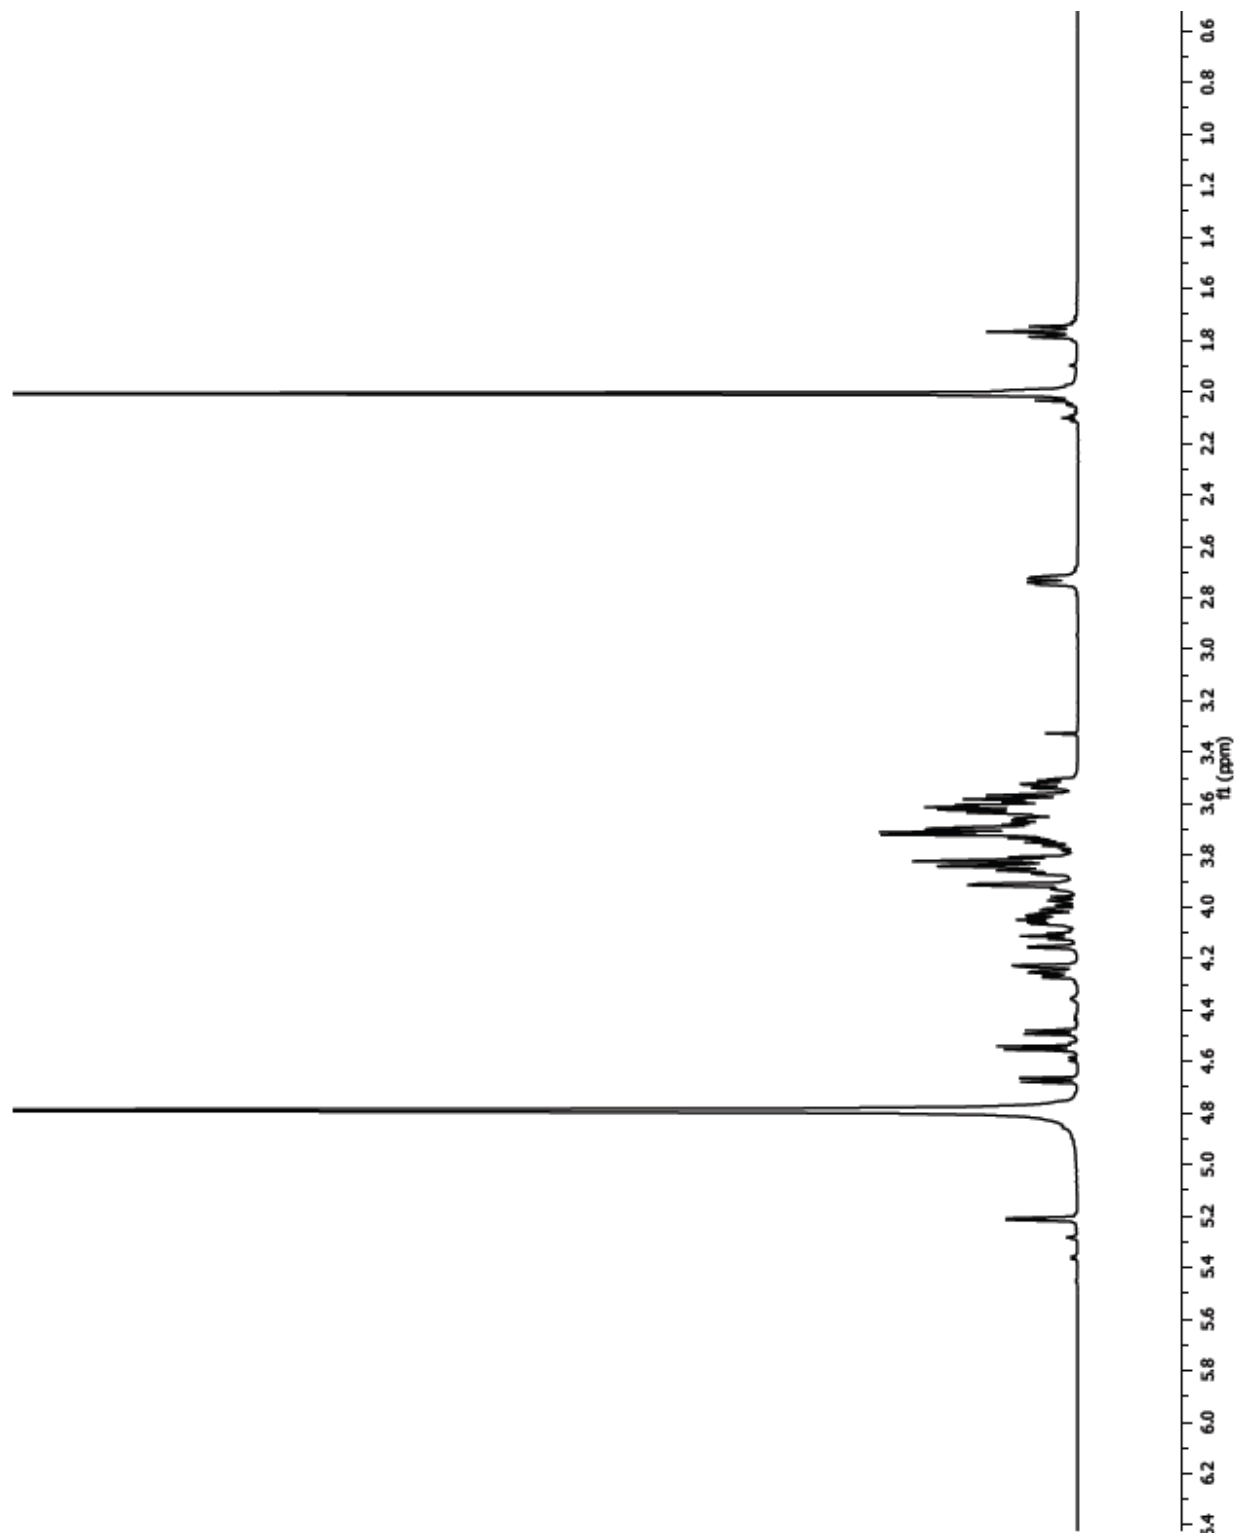

<sup>13</sup>C NMR of sialoside Neu5Acα2-3Galβ1-3GalNAc 23

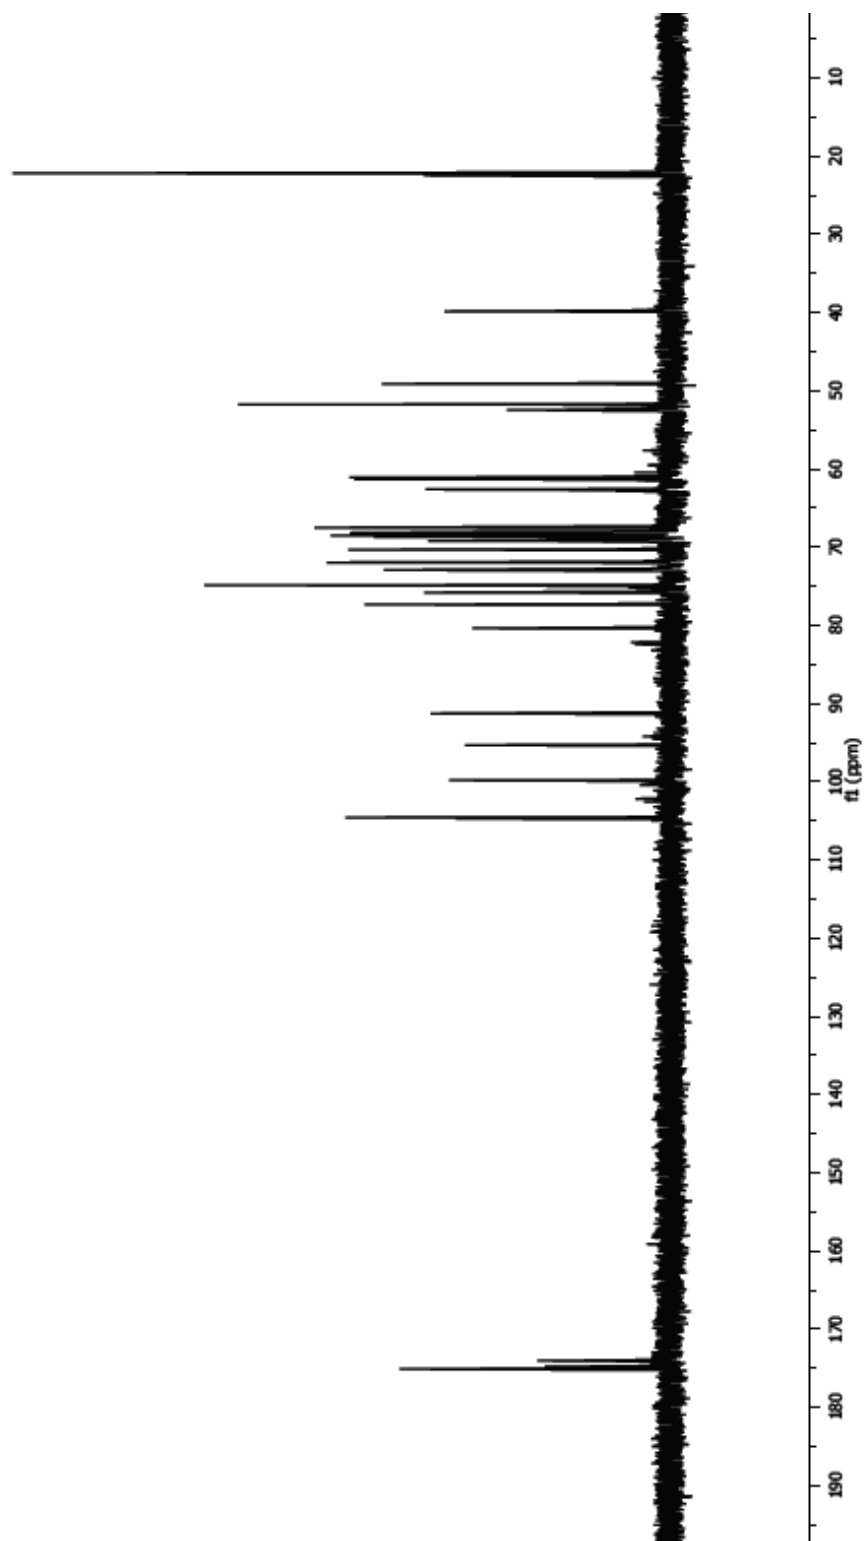

$^1\text{H}$  NMR of sialoside Neu5Ac $\alpha$ 2-3Gal $\beta$ 1-3GalNAc $\beta$ ProN $_3$  **24**

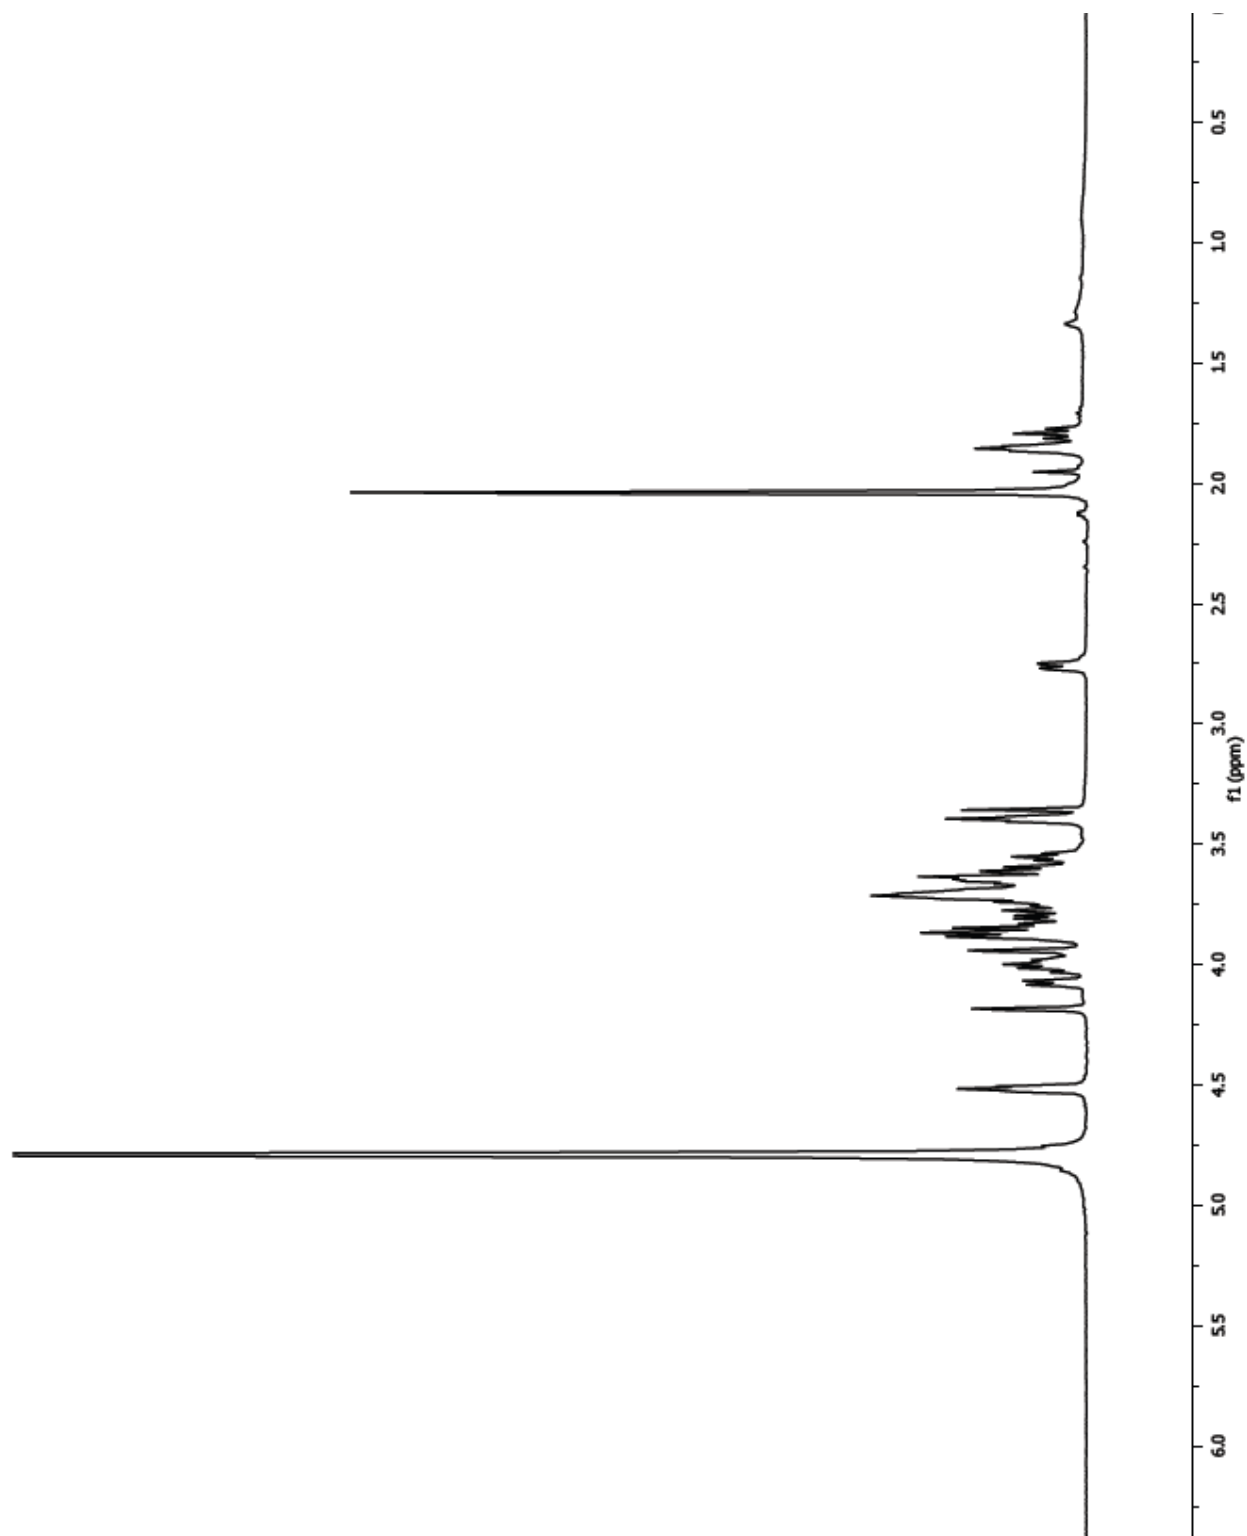



$^{13}\text{C}$  NMR of sialoside Neu5Ac $\alpha$ 2-3Gal $\beta$ 1-3GalNAc $\beta$ ProN $_3$  **24**

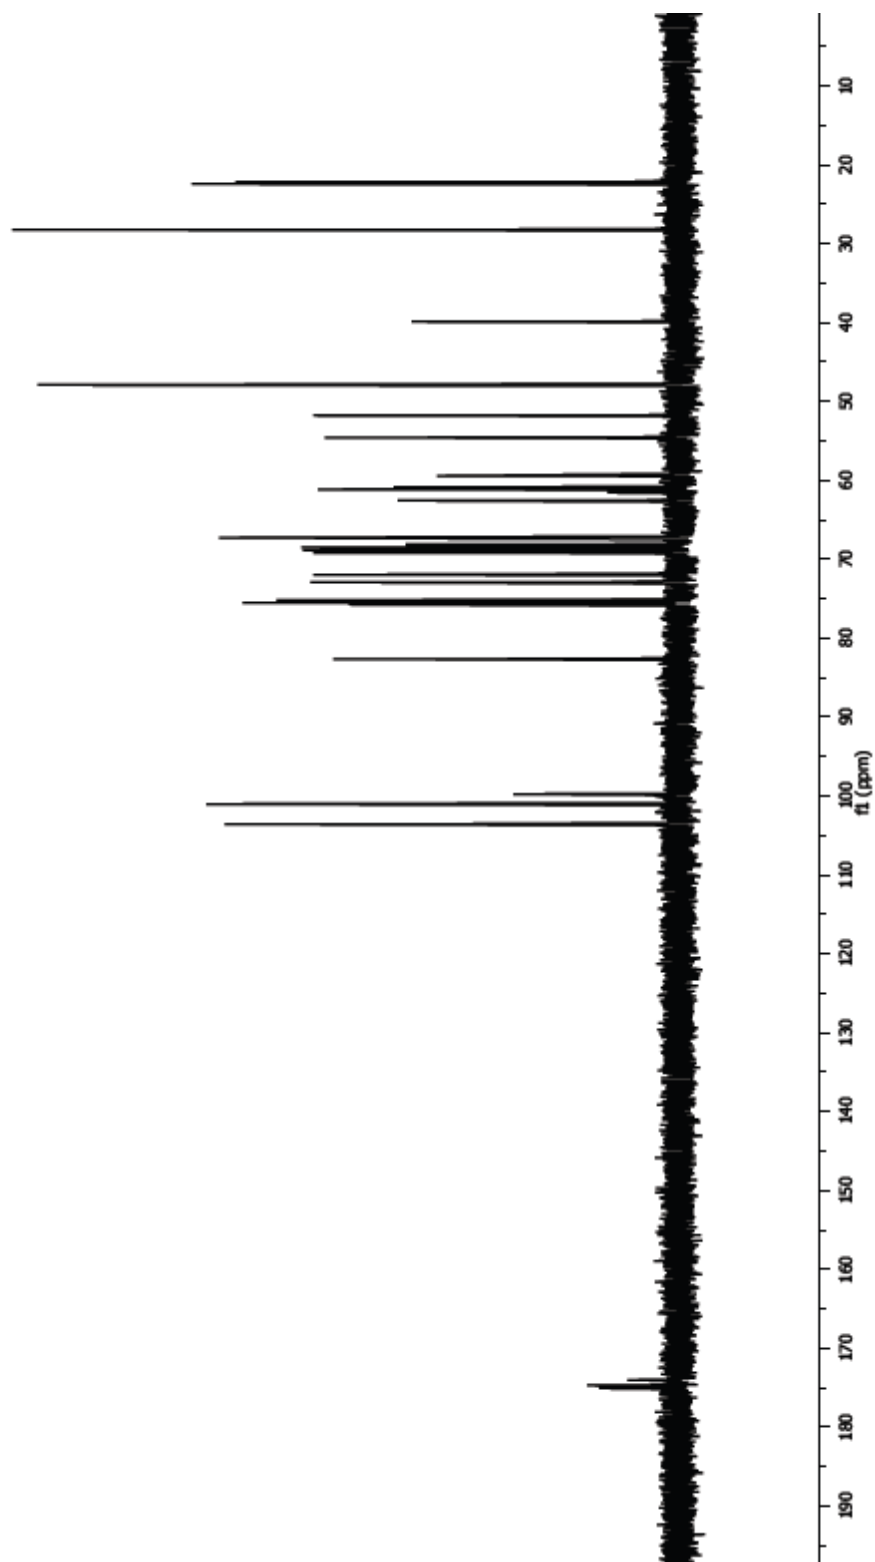

$^1\text{H}$  NMR of sialoside Neu5Ac $\alpha$ 2-3Gal $\beta$ 1-3GalNAc $\alpha$ Ser **25**

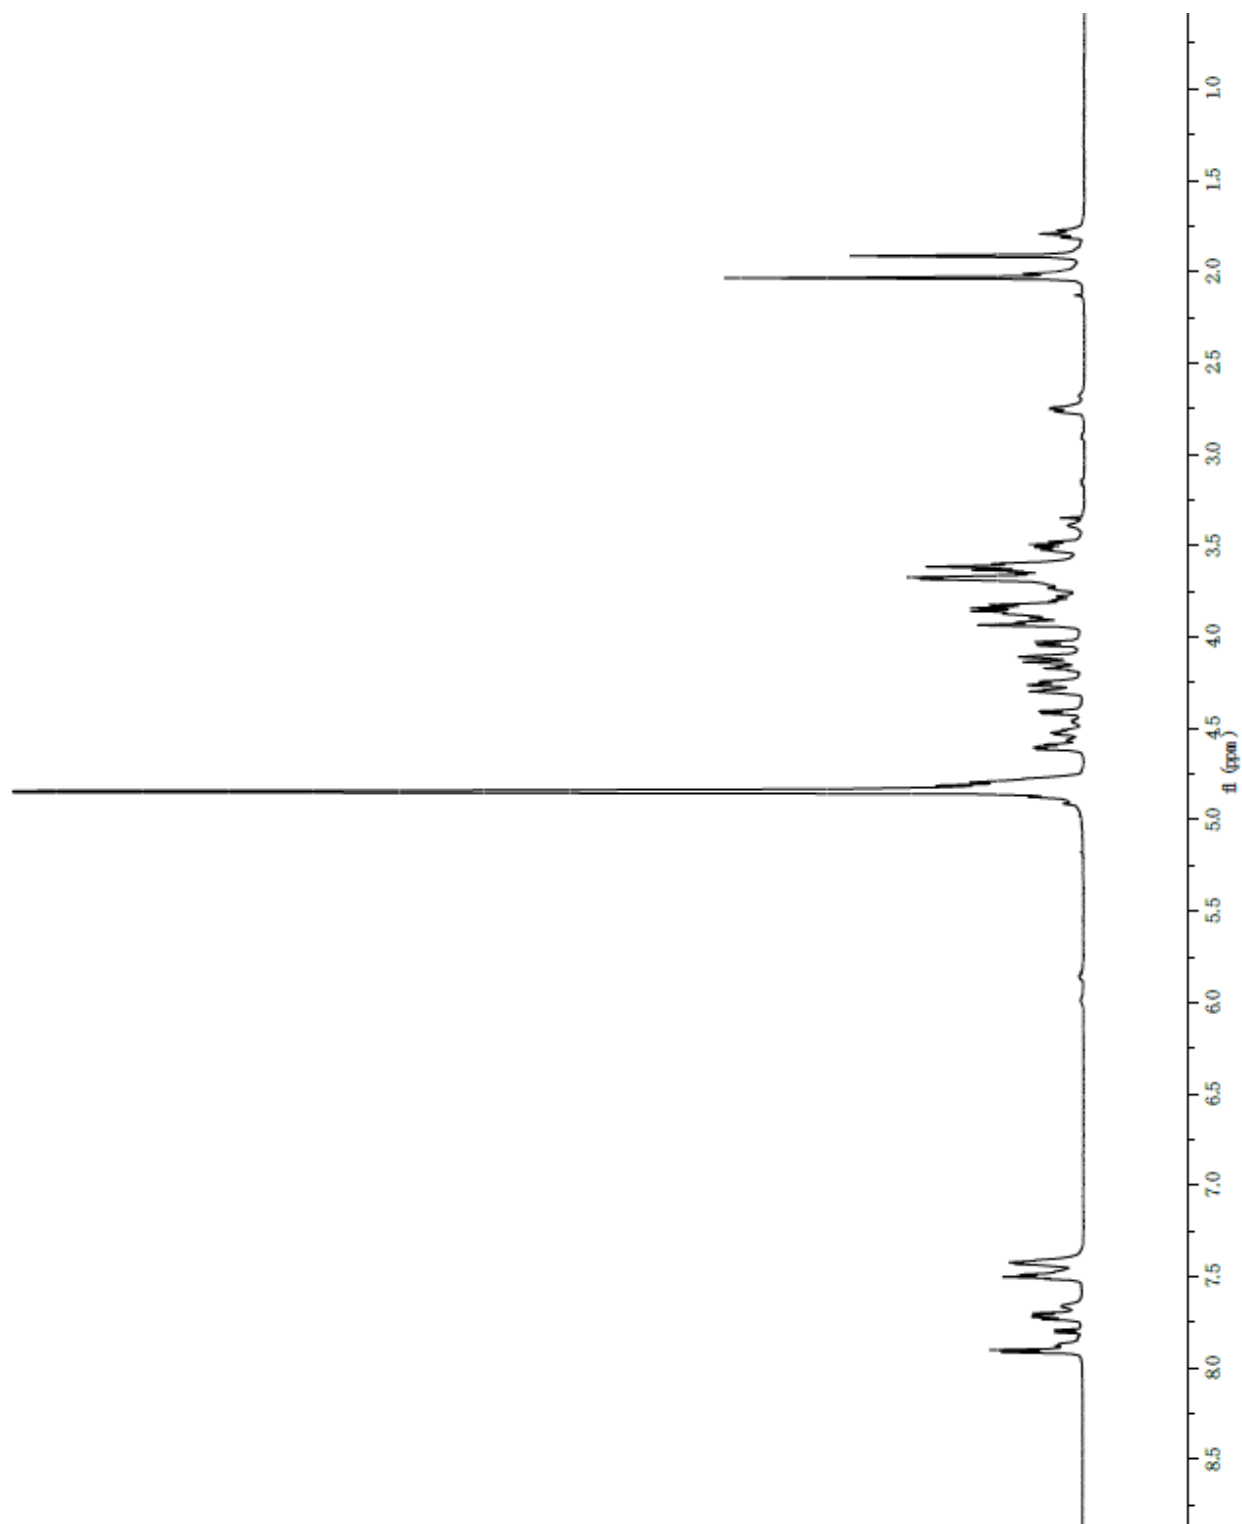

$^{13}\text{C}$  NMR of sialoside Neu5Ac $\alpha$ 2-3Gal $\beta$ 1-3GalNAc $\alpha$ Ser 25

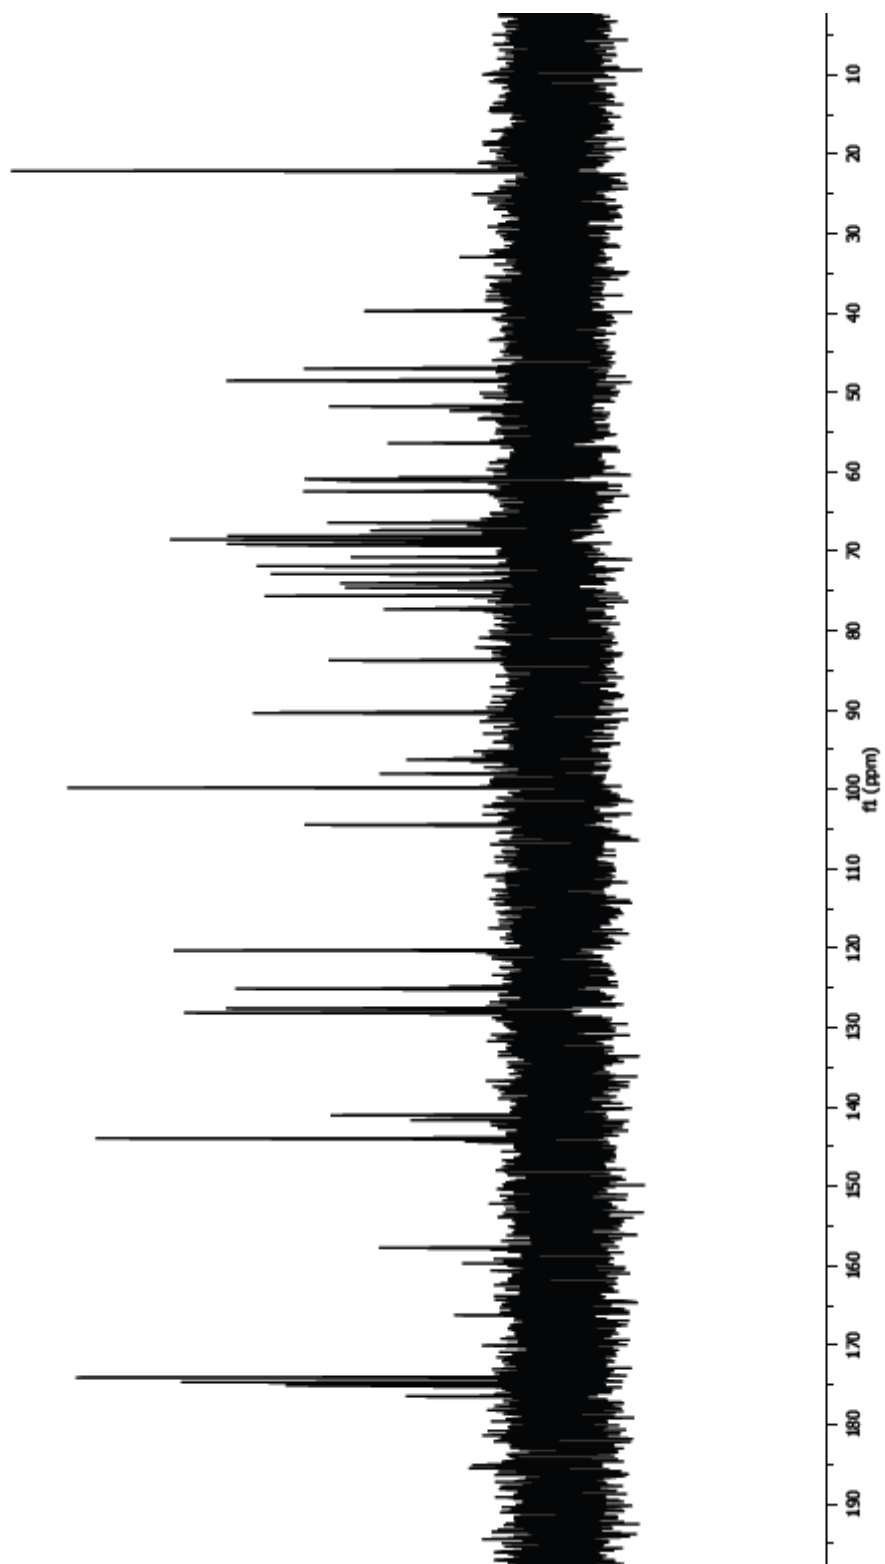

$^1\text{H}$  NMR of sialoside Neu5Ac $\alpha$ 2-3Gal $\beta$ 1-3GalNAc $\alpha$ Thr **26**

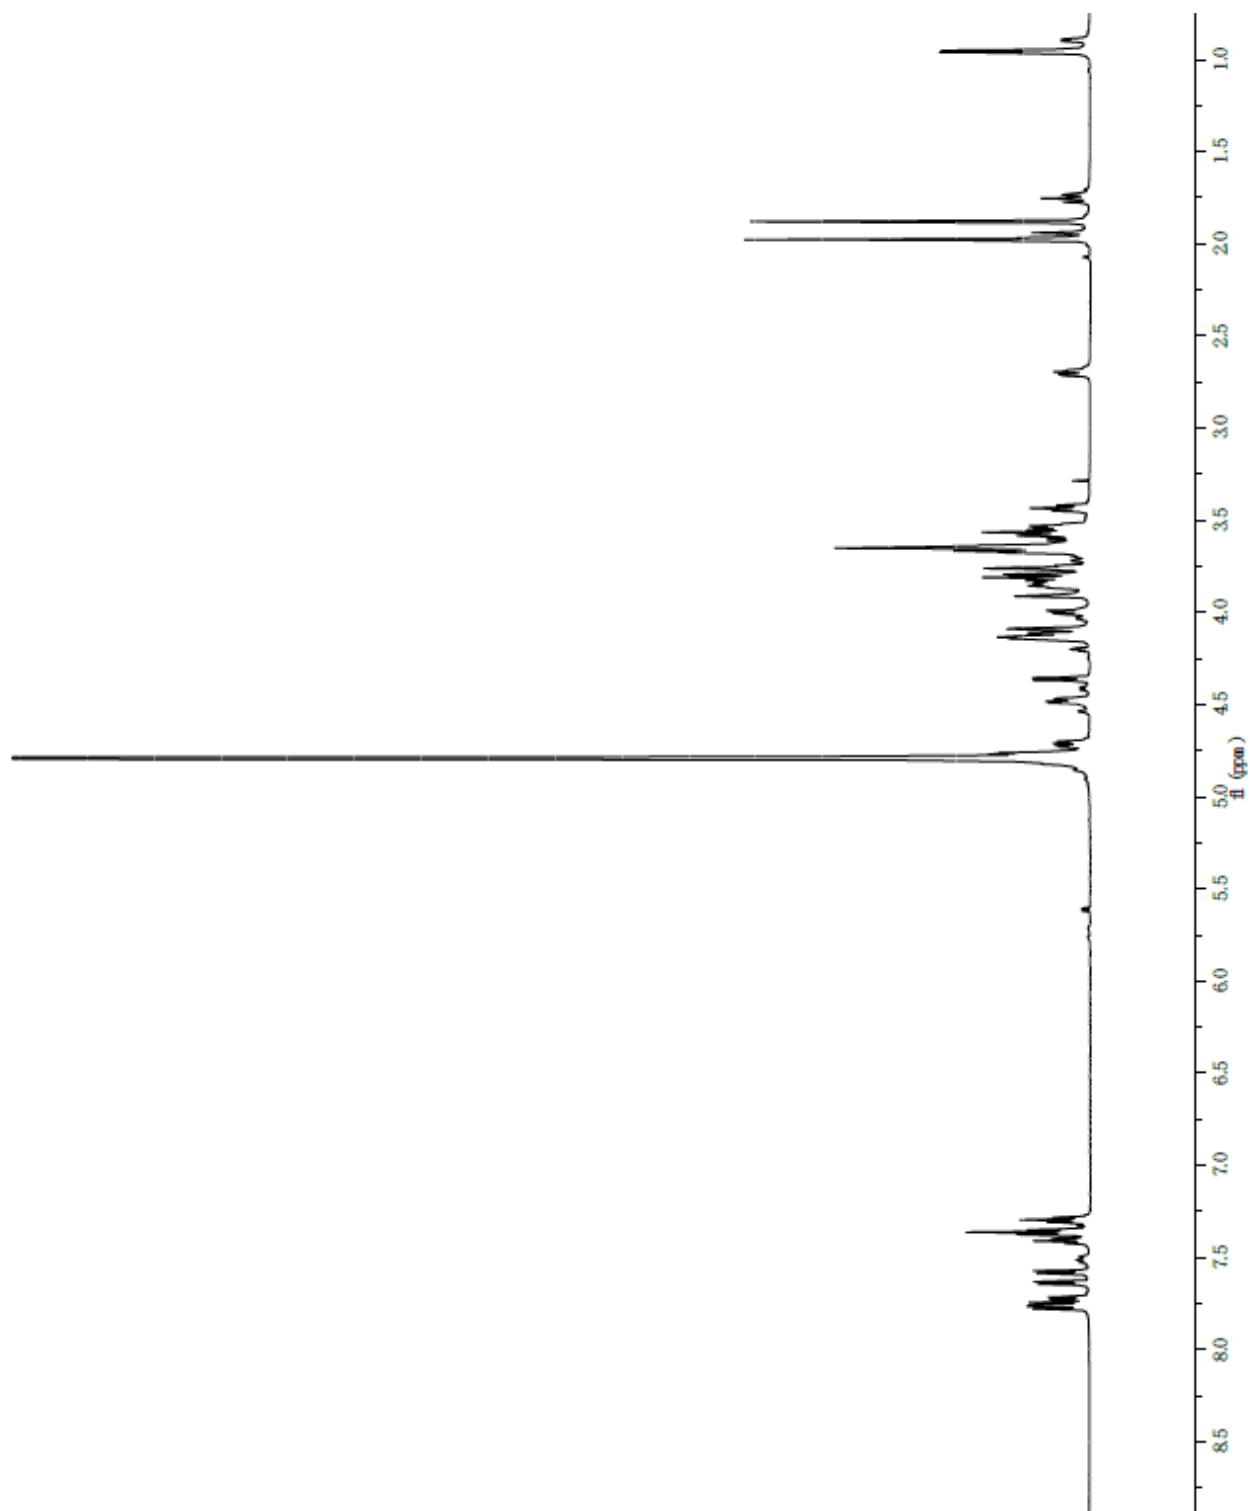

$^{13}\text{C}$  NMR of sialoside Neu5Ac $\alpha$ 2-3Gal $\beta$ 1-3GalNAc $\alpha$ Thr 26

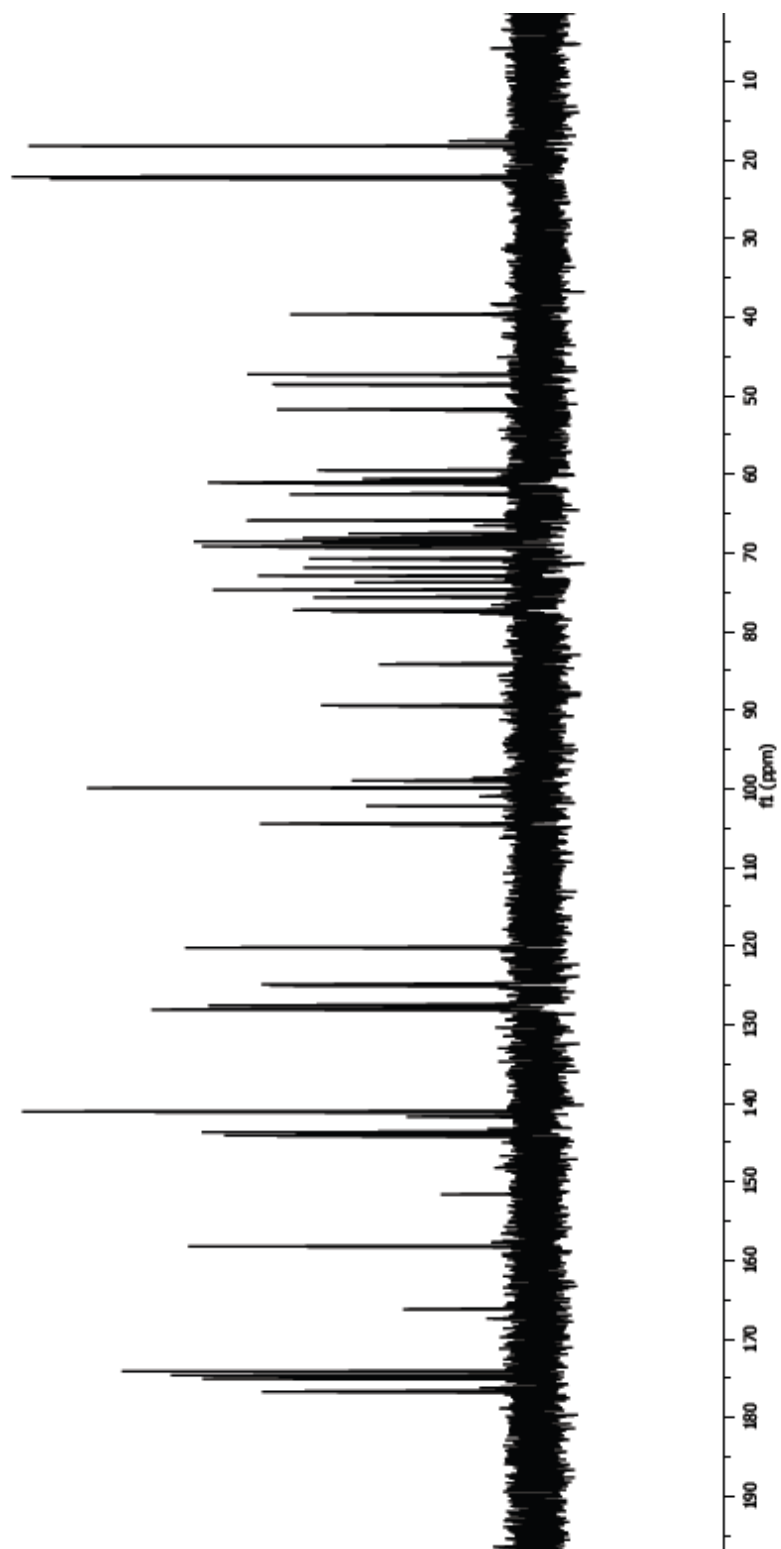

$^1\text{H}$  NMR of sialoside Neu5Ac $\alpha$ 2-3Gal $\beta$ 1-3GlcNAc **27**

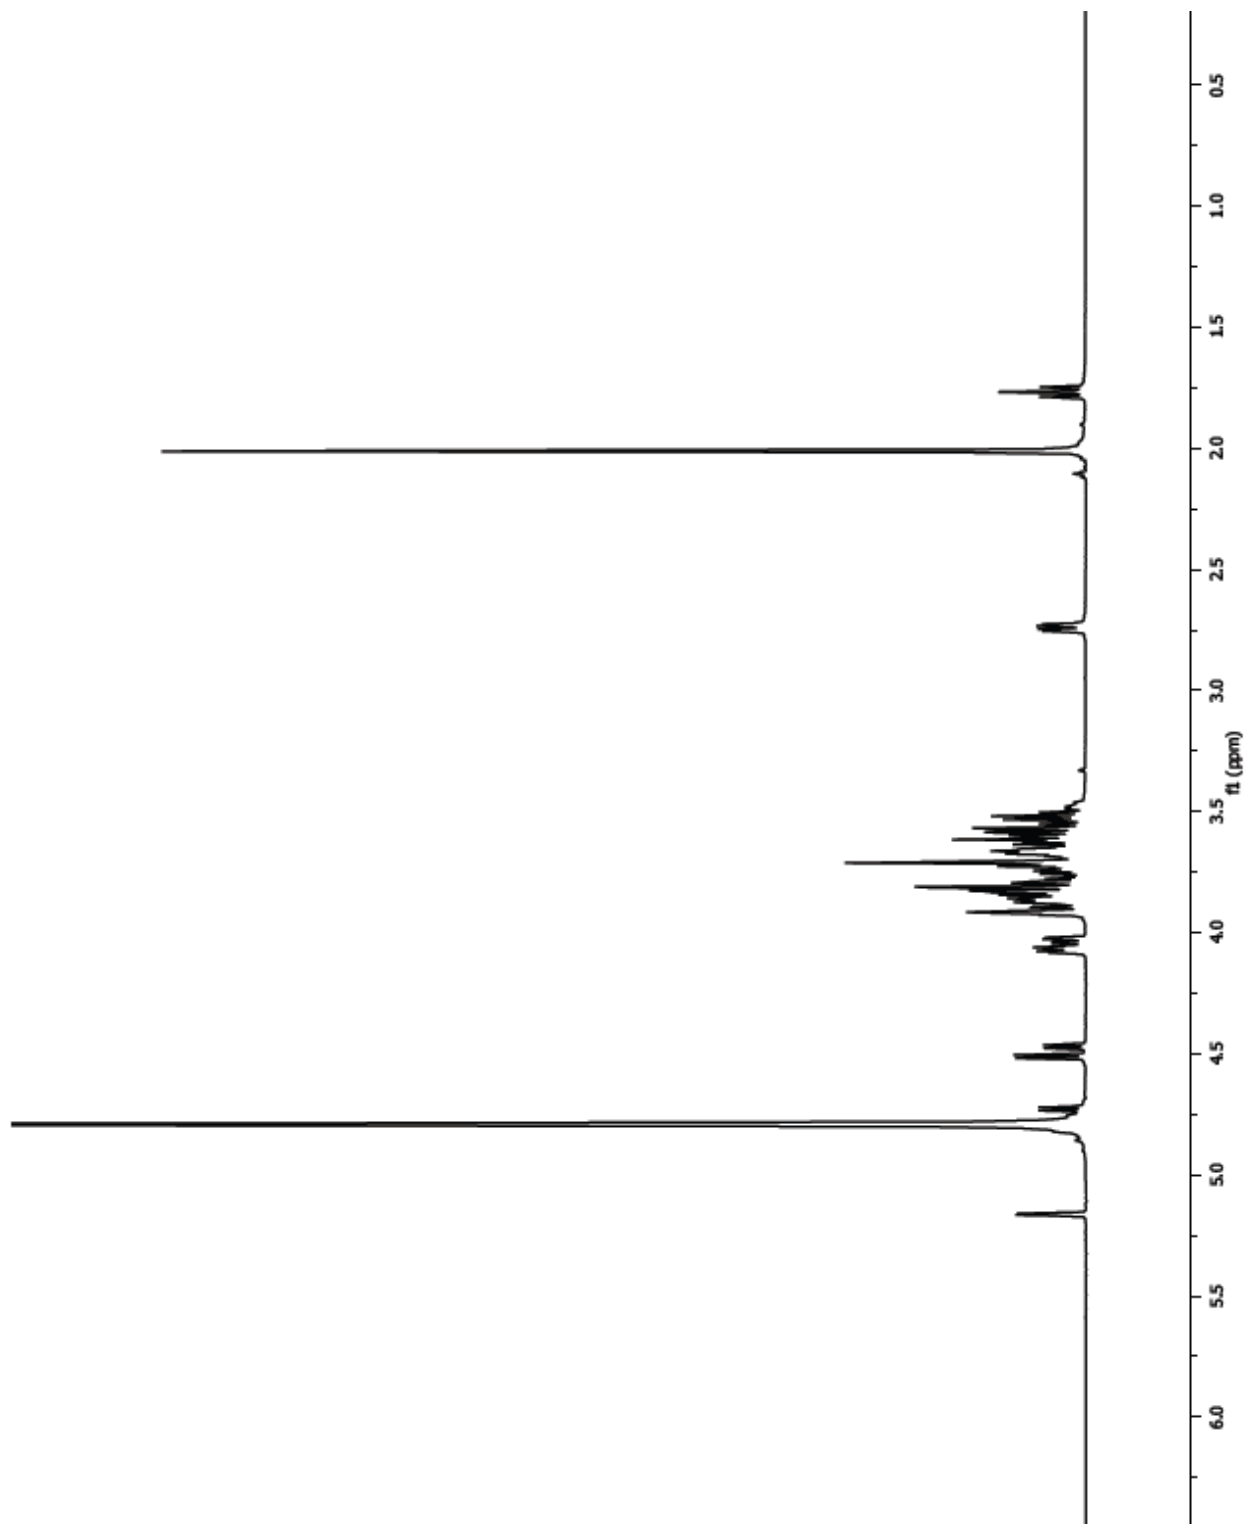

$^{13}\text{C}$  NMR of sialoside Neu5Ac $\alpha$ 2-3Gal $\beta$ 1-3GlcNAc 27

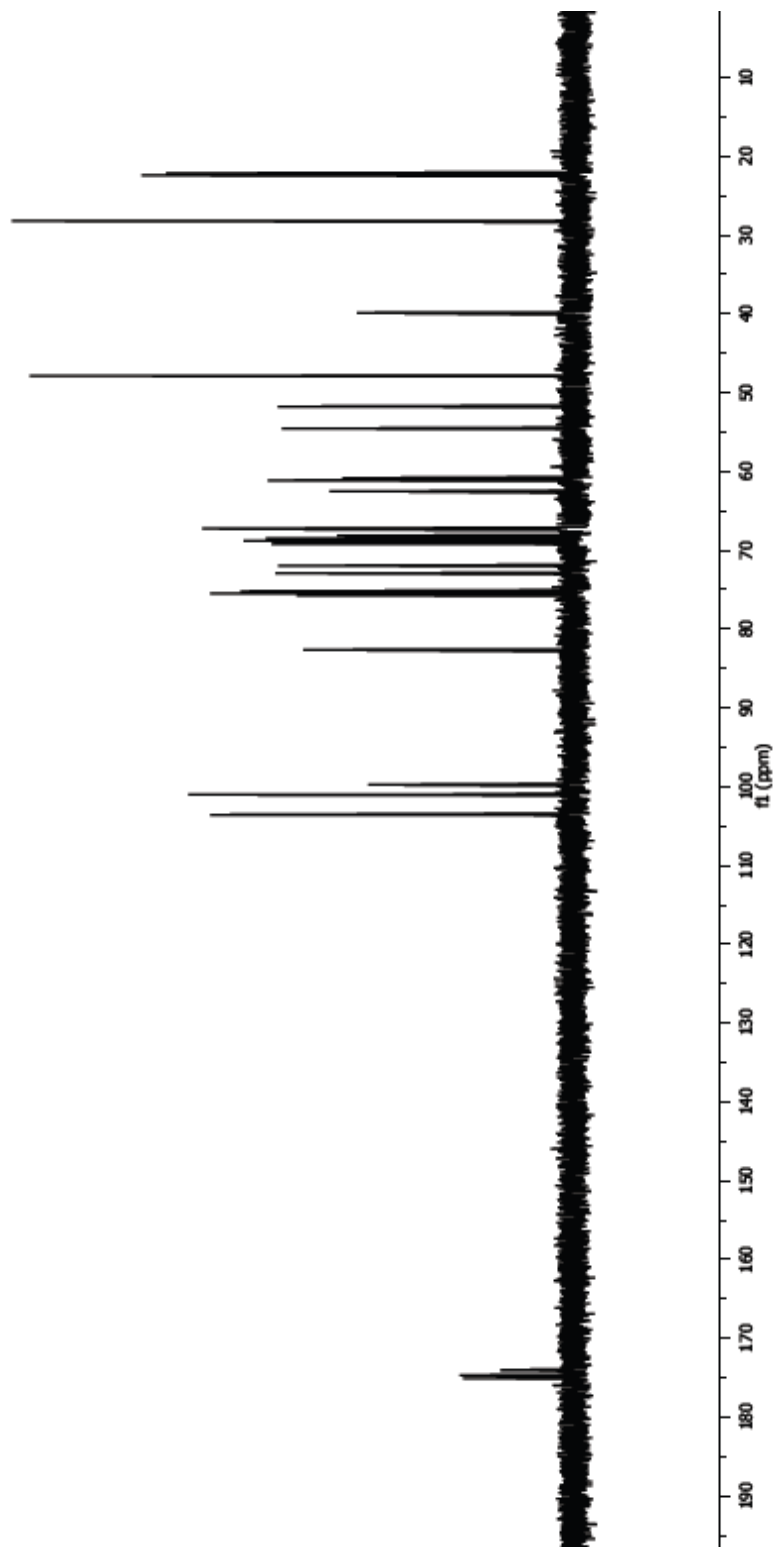

$^1\text{H}$  NMR of sialoside Neu5Ac $\alpha$ 2-3Gal $\beta$ 1-3GlcNAc $\beta$ ProN $_3$  **28**

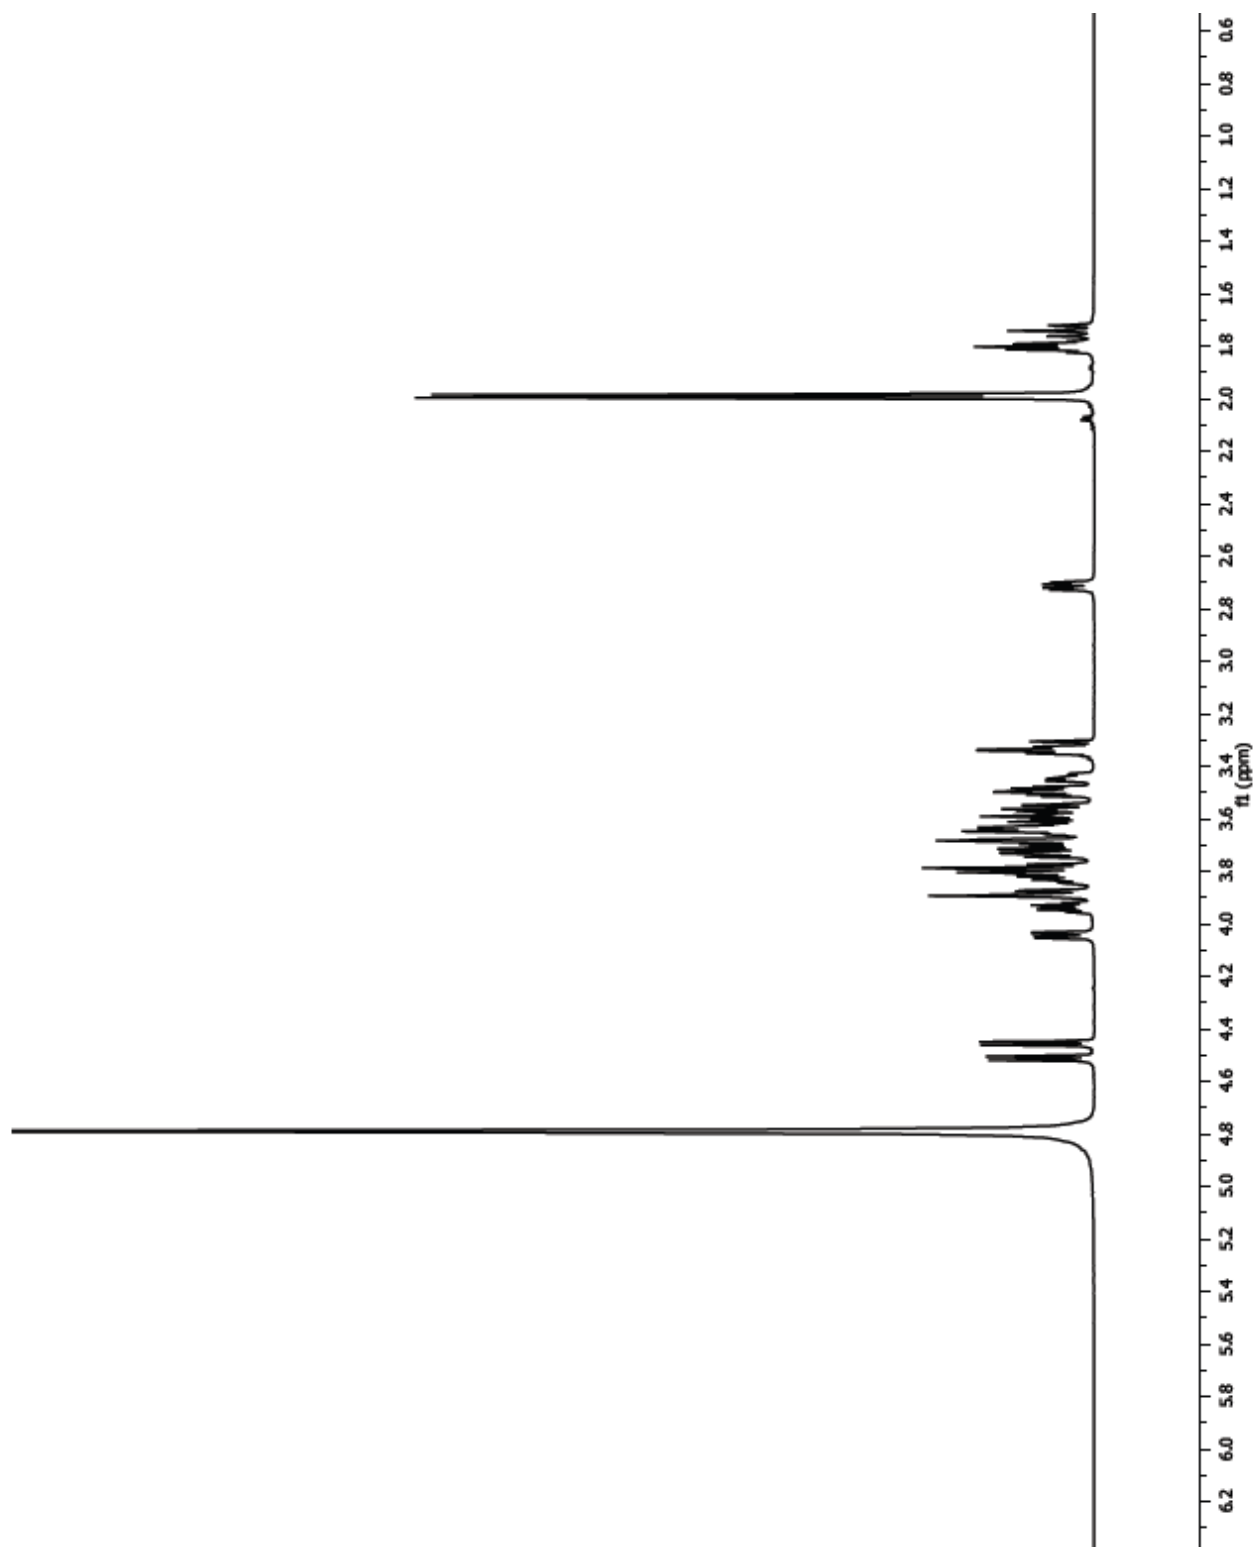



$^{13}\text{C}$  NMR of sialoside Neu5Ac $\alpha$ 2-3Gal $\beta$ 1-3GlcNAc $\beta$ ProN $_3$  **28**

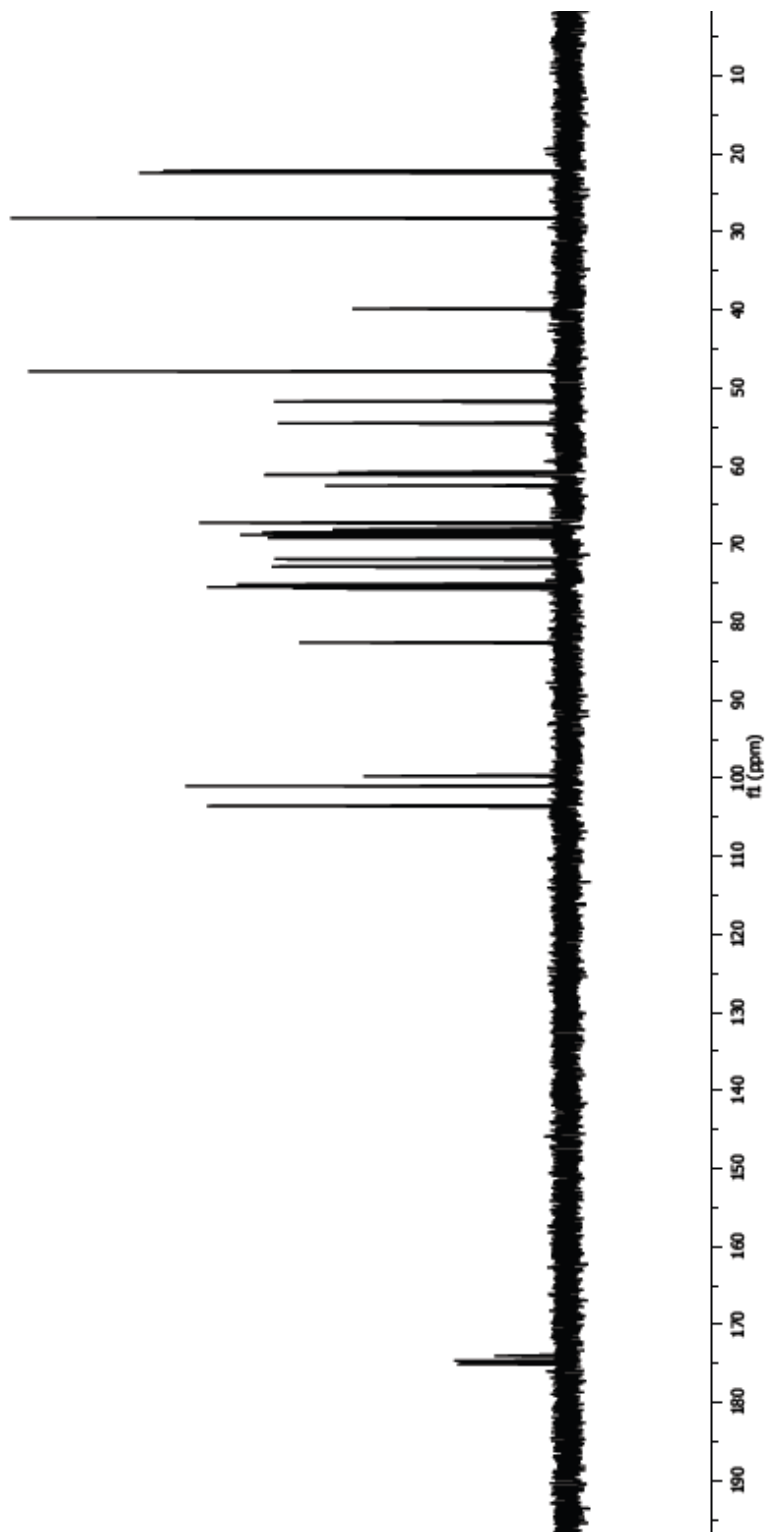

$^1\text{H}$  NMR of sialoside Neu5Ac $\alpha$ 2-3Gal $\beta$ 1-3GlcNAc $\alpha$ ProN $_3$  **29**

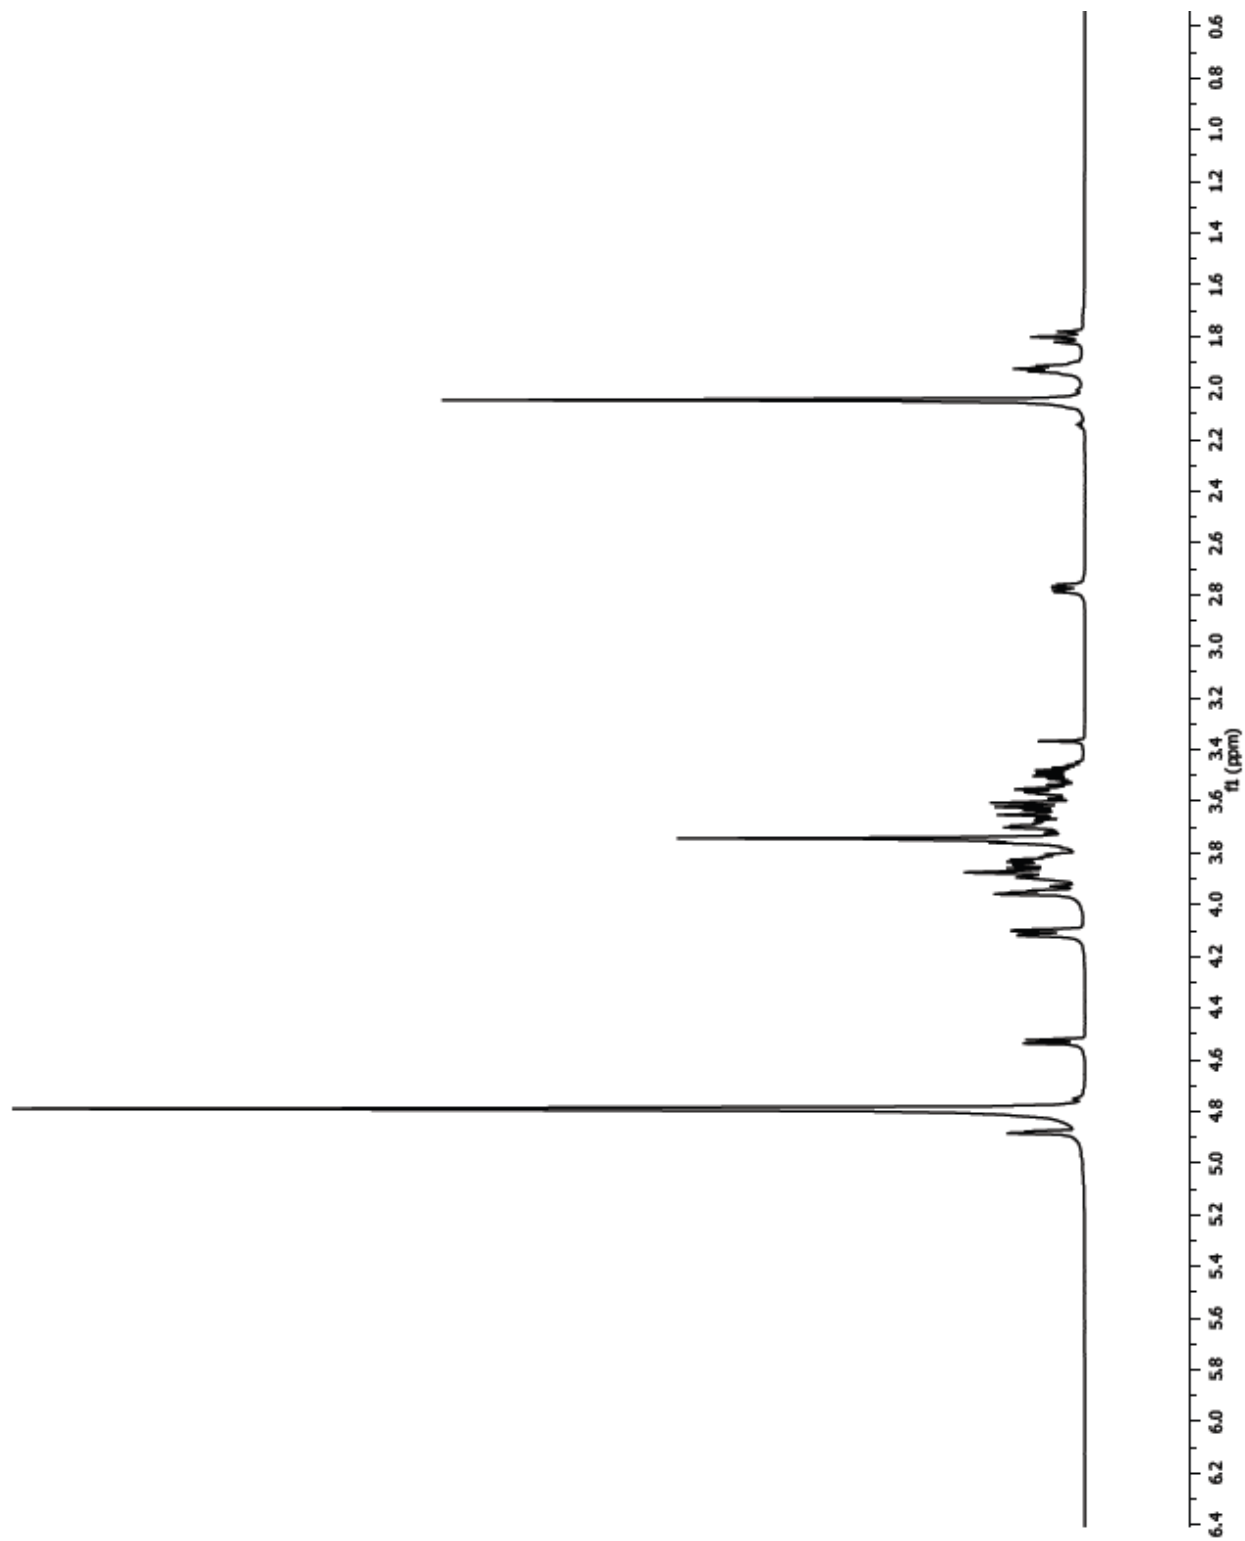

$^{13}\text{C}$  NMR of sialoside Neu5Ac $\alpha$ 2-3Gal $\beta$ 1-3GlcNAc $\alpha$ ProN $_3$  **29**

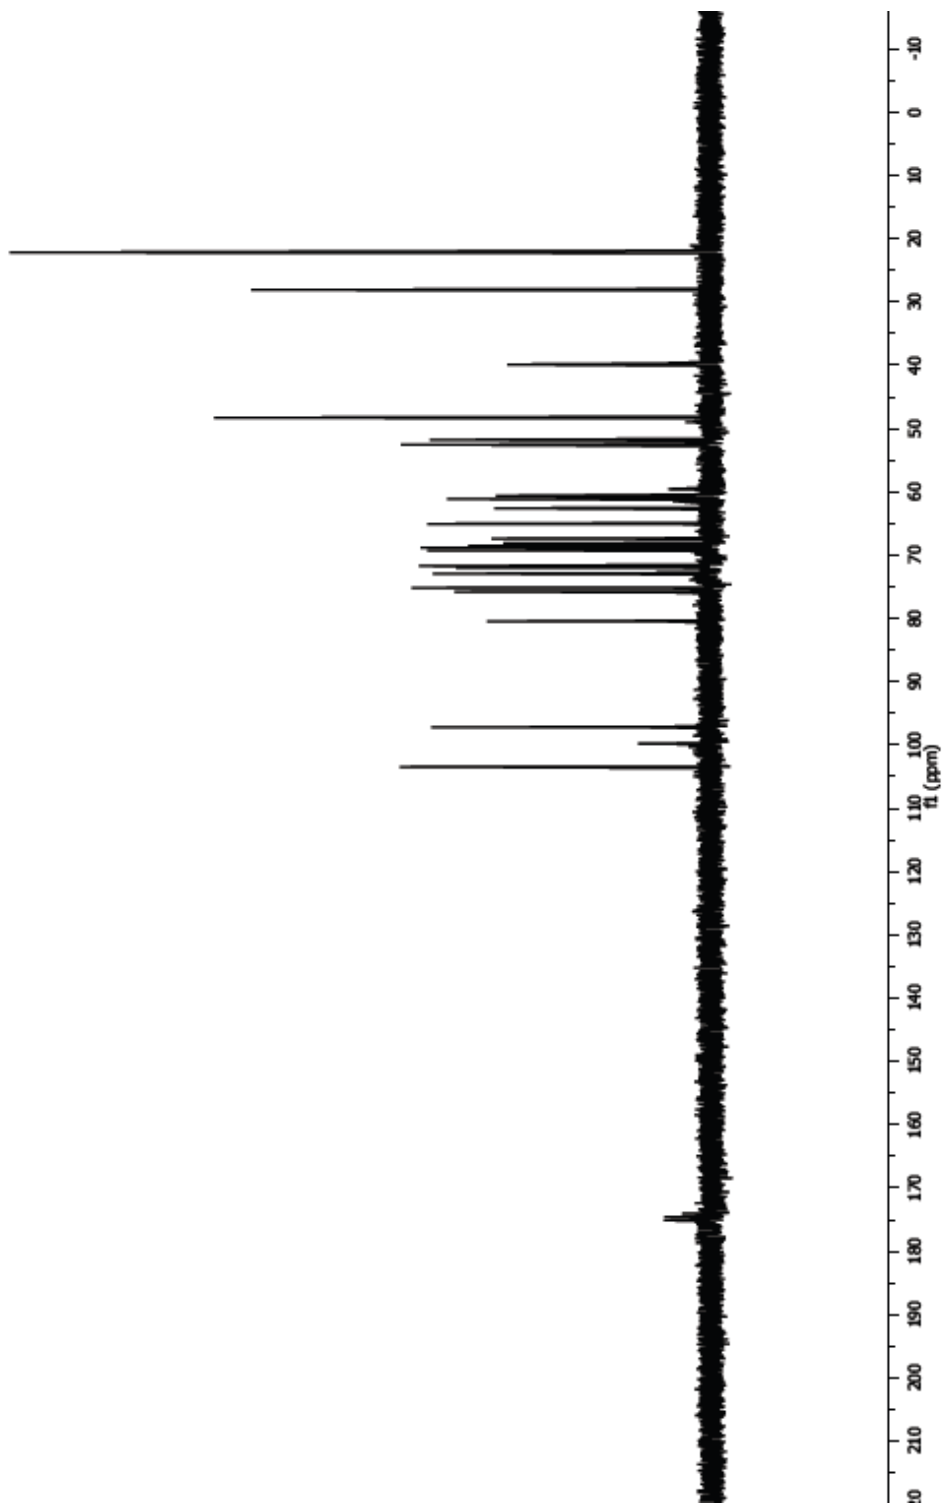

Supplement: NIHMS292919-supplement-Supporting_Information.pdf [file NIHMS292919-supplement-Supporting_Information.pdf]
